# Supplementary material for: Asthma and risk of glioma: a population-based case–control study
Source: PubMed Central journal article supplement — BMJ Open. 2019 Jun 17;9(6):e025746. doi: 10.1136/bmjopen-2018-025746 (PMC6589041; doi:10.1136/bmjopen-2018-025746), 2019-06-17
Supplement: bmjopen-2018-025746.draft_revisions.pdf [file bmjopen-2018-025746.draft_revisions.pdf]

# BMJ Open

BMJ Open is committed to open peer review. As part of this commitment we make the peer review history of every article we publish publicly available.

When an article is published we post the peer reviewers' comments and the authors' responses online. We also post the versions of the paper that were used during peer review. These are the versions that the peer review comments apply to.

The versions of the paper that follow are the versions that were submitted during the peer review process. They are not the versions of record or the final published versions. They should not be cited or distributed as the published version of this manuscript.

BMJ Open is an open access journal and the full, final, typeset and author-corrected version of record of the manuscript is available on our site with no access controls, subscription charges or pay-per-view fees (<http://bmjopen.bmj.com>).

If you have any questions on BMJ Open's open peer review process please email [info.bmjopen@bmj.com](mailto:info.bmjopen@bmj.com)

# BMJ Open

## Asthma and Risk of Glioma: A Population-Based Case-Control Study

|                               |                                                                                                                                                                                                                                                                                                                                                                                                                                                                                                                                                                                                                                                                                                                   |
|-------------------------------|-------------------------------------------------------------------------------------------------------------------------------------------------------------------------------------------------------------------------------------------------------------------------------------------------------------------------------------------------------------------------------------------------------------------------------------------------------------------------------------------------------------------------------------------------------------------------------------------------------------------------------------------------------------------------------------------------------------------|
| Journal:                      | <i>BMJ Open</i>                                                                                                                                                                                                                                                                                                                                                                                                                                                                                                                                                                                                                                                                                                   |
| Manuscript ID                 | bmjopen-2018-025746                                                                                                                                                                                                                                                                                                                                                                                                                                                                                                                                                                                                                                                                                               |
| Article Type:                 | Research                                                                                                                                                                                                                                                                                                                                                                                                                                                                                                                                                                                                                                                                                                          |
| Date Submitted by the Author: | 06-Aug-2018                                                                                                                                                                                                                                                                                                                                                                                                                                                                                                                                                                                                                                                                                                       |
| Complete List of Authors:     | Kaur, Harsheen; University of New Mexico, Pediatric Neurology<br>Lachance, Daniel; Mayo Clinic, Neurology<br>Ryan, Conor; Mayo Clinic, Child and Adolescent Neurology<br>Sheen, Youn Ho; CHA Gangnam Medical Center, Pediatrics; Mayo Clinic, Pediatric and Adolescent Medicine<br>Seol, Hee Yun; Mayo Clinic, Pediatric and Adolescent Medicine<br>Wi, Chung-II ; Mayo Clinic Minnesota, Pediatric and Adolescent Medicine<br>Sohn, Sunghwan; Mayo Clinic, Biomedical Statistics and Informatics<br>King, Katherine; Mayo Clinic Minnesota, Biomedical statistics and informatics<br>Ryu, Euijung; Mayo Clinic, Health Science Research<br>Juhn, Young; Mayo Clinic, Community Pediatric and Adolescent Medicine |
| Keywords:                     | Asthma < THORACIC MEDICINE, Epidemiology < TROPICAL MEDICINE, Allergy < THORACIC MEDICINE                                                                                                                                                                                                                                                                                                                                                                                                                                                                                                                                                                                                                         |
|                               |                                                                                                                                                                                                                                                                                                                                                                                                                                                                                                                                                                                                                                                                                                                   |

SCHOLARONE™  
Manuscripts

Only

## Asthma and Risk of Glioma: A Population-Based Case-Control Study

Harsheen Kaur<sup>1,2</sup>,MD, Daniel H. Lachance<sup>3</sup>,MD, Conor S. Ryan<sup>4</sup>,MD, Youn Ho Sheen<sup>1,5</sup>,MD, Hee Yun Seol<sup>1</sup>,MD, Chung-II Wi<sup>1</sup>,MD, Sunghwan Sohn<sup>6</sup>,PhD, Katherine S. King<sup>6</sup>,MS, Euijung Ryu<sup>6</sup>,PhD, Young J. Juhn<sup>7\*</sup> MD, MPH

<sup>1</sup>Department of Pediatric and Adolescent Medicine, Mayo Clinic, Rochester, Minnesota, USA; <sup>2</sup>Department of Pediatric Neurology, University of New Mexico, Albuquerque, New Mexico, USA; <sup>3</sup>Department of Neurology, Mayo Clinic, Rochester, MN, USA; <sup>4</sup>Division of Child and Adolescent Neurology, Mayo Clinic, Rochester, MN, USA, <sup>5</sup>Department of Pediatrics, CHA Gangnam Medical Center, CHA University School of Medicine, Seoul, Korea; <sup>6</sup>Division of Biomedical Statistics and Informatics, Mayo Clinic, Rochester, MN,USA;; <sup>7</sup>Department of Pediatric and Adolescent Medicine/Internal Medicine, Mayo Clinic, Rochester, MN, USA

### \*Correspondence to: Young J. Juhn, MD, MPH

Professor of Pediatrics

Asthma Epidemiology Research Unit

Department of Pediatric and Adolescent Medicine, Mayo Clinic

200 1st Street SW, Rochester, MN 55905

E-mail: [Juhn.young@mayo.edu](mailto:Juhn.young@mayo.edu)

Phone: 507-538-1642

Fax: 507-284-9744

1  
2  
3 **Contributorship statement:** All authors meet the criteria for authorship based on the  
4 following four requirements: (1) substantial contributions to the conception or design of  
5 the work; or the acquisition, analysis, or interpretation of data for the work; (2) drafting  
6 the work or revising it critically for important intellectual content; (3) final approval of the  
7 version to be published; and (4) agreement to be accountable for all aspects of the work  
8 in ensuring that questions related to the accuracy or integrity of any part of the work are  
9 appropriately investigated and resolved. Specifically, Y.J.J. had full access to all of the  
10 data in the study, takes responsibility for the integrity of the data and the accuracy of the  
11 data analysis, and had authority over manuscript preparation and the decision to submit  
12 the manuscript for publication.  
13  
14  
15  
16  
17  
18  
19  
20  
21  
22  
23  
24

25  
26 Study concept and design: C.W., D.L., and Y.J.J.

27  
28 Acquisition, analysis, or interpretation of data: H.K., C.R., Y.S., H.S., C.W., K.K., E.R.,  
29 D.L., and Y.J.J. Drafting of the manuscript: H.K., C.R., H.S., C.W., E.R., D.L., and Y.J.J.

30  
31  
32  
33 Critical revision of the manuscript for important intellectual content: all authors.

34  
35 Statistical analysis: C.W., K.K., and E.R.

36  
37 Study supervision: C.W., D.L., and Y.J.J.  
38  
39  
40  
41  
42  
43  
44  
45  
46  
47  
48  
49  
50  
51  
52  
53  
54  
55  
56  
57  
58  
59  
60

**Abstract (257/300 words)**

**Objectives:** Literature suggests an inconsistent, but largely inverse, association between asthma and risk of glioma, which is primarily due to methodological inconsistency in sampling frame and ascertainment of asthma and/or glioma diagnosis. Objective of the study was to clarify the association between asthma and risk of glioma by minimizing methodological biases.

**Design:** A population-based case-control study

**Setting:** General population in Olmsted County, Minnesota, US

**Participants:** All eligible biopsy-proven incident glioma cases (1995-2014) and two sets of controls among residents matched to age and sex (1<sup>st</sup> set: community controls without glioma; 2<sup>nd</sup> set: MRI-negative controls from the same community).

**Methods:** The predetermined asthma criteria via medical record review were applied to ascertain asthma status of cases and controls. History of asthma prior to index date was compared between glioma cases and their matched controls using conditional logistic regression models.

**Results:** We enrolled 135 glioma cases (median age at index date: 53 years) and 270 controls. Of the cases, 21 had a history of asthma (16%), compared to 17 of community controls (13%) and 36 of MRI controls (27%) [OR (95%CI): 1.29 (0.64-2.59), p=0.48, for community control versus 0.48 (0.26-0.91), p=0.03, for MRI control]. With MRI controls, inverse association between asthma and risk of glioma remained after adjusting for smoking and socioeconomic status but was not statistically significant [OR (95%CI): 0.55 (0.28-1.08), p=0.08].

1  
2  
3 **Conclusions:** While differential detection might account for the association between  
4  
5 asthma and risk of glioma, asthma may pose a protective effect on risk of glioma. Our  
6  
7 study results need to be replicated by a larger study.  
8  
9

10  
11  
12 Key Words (3-5 words): glioma, asthma, epidemiology, sampling, allergy  
13  
14

15  
16  
17 **Strengths and limitations of this study:**  
18

- 19  
20 1. This is a population-based case-control study performed in a self-contained  
21  
22 community to address selection bias.  
23  
24 2. Predetermined asthma criteria (exposure) and biopsy-proven glioma case  
25  
26 ascertainment (outcome) were used along with two different sets of controls to  
27  
28 mitigate detection bias.  
29  
30 3. Laboratory data and lung function testing results not included in the study results.  
31  
32 4. Our study includes a small number of glioma cases with study setting mostly  
33  
34 consisting of Caucasian patients (i.e., limited generalizability)  
35  
36  
37  
38  
39  
40  
41

42 **Data sharing statement:** No additional data available.  
43  
44  
45

46  
47 **Funding source:** This was supported by NIH-funded R01 grant (R01 HL126667) and  
48  
49 R21 grant (R21AI116839-01). This study was also made possible using the resources  
50  
51 of the Rochester Epidemiology Project, which is supported by the National Institute on  
52  
53 Aging of the National Institutes of Health under Award Number R01AG034676. Its  
54  
55  
56  
57  
58  
59  
60

1  
2  
3  
4  
5  
6  
7  
8  
9  
10  
11  
12  
13  
14  
15  
16  
17  
18  
19  
20  
21  
22  
23  
24  
25  
26  
27  
28  
29  
30  
31  
32  
33  
34  
35  
36  
37  
38  
39  
40  
41  
42  
43  
44  
45  
46  
47  
48  
49  
50  
51  
52  
53  
54  
55  
56  
57  
58  
59  
60

contents are solely the responsibility of the authors and do not necessarily represent the official view of NIH.

For peer review only

1  
2  
3 **Word count: 2999 / 3,000 words**  
4

## 5 **INTRODUCTION**

6  
7 Glioma is the most common primary intracranial malignant tumor (1). Approximately,  
8 17,600 new cases of gliomas are diagnosed per year with a 5-year survival rate of 27%  
9  
10 (2). Although treatment options have improved with better understanding of the  
11  
12 molecular biology of these tumors, malignant glioma remains incurable with largely  
13  
14 unknown etiology.(3).  
15  
16  
17  
18  
19

20 Recently, germline variants highly associated with glioma were shown to interact with  
21  
22 asthma and allergy risk, indicating an immunological involvement in the risk of glioma  
23  
24 (4, 5). Single nucleotide polymorphisms related with glioma have also been studied for  
25  
26 an association with atopic dermatitis (6). Several studies describe the association  
27  
28 between atopy or asthma and developments of gliomas (7, 8) but the results have been  
29  
30 inconsistent (9, 10). eTable 1 summarizes literature regarding asthma (or atopic  
31  
32 conditions) and risk of glioma as well as their study designs.  
33  
34  
35  
36

37 An inverse association between history of allergy and risk of glioma was found in the  
38  
39 majority of studies (11). These studies have methodological limitations. For example,  
40  
41 some studies were cross-sectional ones obscuring temporality between asthma  
42  
43 (exposure) and risk of glioma (outcome)(12, 13). Some studies allowed dissimilarity  
44  
45 between cases (referred glioma cases identified from a tertiary center, cases identified  
46  
47 by ICD codes) and controls (community population) in terms of source population  
48  
49 (susceptibility bias and detection bias) (14). Many studies are based on self-reported  
50  
51 allergic conditions, which can be influenced by the rapidly debilitating nature of glioma  
52  
53  
54  
55  
56  
57  
58  
59  
60



1  
2  
3 causing cognitive and memory impairment leading to misclassification of asthma.(4, 5,  
4  
5 12, 15)  
6  
7

8  
9 To address these limitations in assessing the relationship between asthma and risk of  
10 glioma, we designed this study as a population-based case-control study that enrolled  
11 all eligible biopsy-proven incident glioma cases and two sets of matched-controls from  
12 the community population i.e., (1) community controls who do not have history of  
13 glioma, and (2) MRI-controls with negative test results. This study design allows  
14 examining a potential detection bias. In addition, we utilized predetermined asthma  
15 criteria (delineated in Table 1) and performed a comprehensive medical record review  
16 to objectively ascertain the asthma status.  
17  
18  
19  
20  
21  
22  
23  
24  
25  
26  
27  
28  
29

## 30 **METHODS:**

### 31 Study Setting

32  
33  
34  
35 Olmsted County, southeastern Minnesota is an excellent setting to conduct a  
36 population-based epidemiologic study because medical care is virtually self-contained  
37 within the community. When patients register with any health care providers in the  
38 community, they or their parents/legal guardian are asked to grant authorization of use  
39 of their medical records for research. Authorization is granted by over 95% of all  
40 individuals. Comprehensive medical records research at Olmsted County is made  
41 possible through the Rochester Epidemiology Project (REP), which has been  
42 continuously funded by NIH and maintained since 1966.(16) The REP database  
43 consists of all medical records from two major medical centers (Mayo Clinic Rochester  
44 and Olmsted Medical Center) and their affiliated hospitals. Only those individuals with  
45  
46  
47  
48  
49  
50  
51  
52  
53  
54  
55  
56  
57  
58  
59  
60

1  
2  
3 current research authorization were included in this study. The population  
4  
5 demographics of Olmsted County and of those included the REP database have been  
6  
7 previously described.(16)  
8  
9

### 10 11 12 Study Design and Study Subjects: 13

14 A retrospective population-based case-control design was employed. Patients  
15  
16 diagnosed with glioma (cases) during 1995-2014 and their two matched controls (see  
17  
18 Case Ascertainment and Selection of Controls) were identified from the REP database  
19  
20 representing Olmsted County, MN residents. Asthma status prior to index date of cases  
21  
22 and their matched controls was ascertained by predetermined asthma criteria and its  
23  
24 frequency was compared between cases and controls (each control group and both  
25  
26 control groups separately). The Olmsted Medical Center (OMC) and Mayo Clinic  
27  
28 Institutional Review Boards approved this study.  
29  
30  
31  
32  
33  
34

### 35 Patient and public involvement 36

37 *No patients or the public were involved in the study protocol design, the specific aims or*  
38  
39 *the research questions, and the plans for the design or implementation of the current*  
40  
41 *study. No patients or the public were involved in the interpretation of the results of the*  
42  
43 *study or preparation of the manuscript. There are no plans to disseminate the results of*  
44  
45 *the research to study participants.*  
46  
47  
48  
49

### 50 51 Case Ascertainment 52 53 54 55 56 57 58 59 60

1  
2  
3 All Olmsted County residents who developed glioma during the study period of January  
4  
5 1<sup>st</sup>, 1995, to December 31<sup>st</sup>, 2014, were identified from the Mayo Clinic Tumor Registry  
6  
7 and the REP using medical index search codes. The medical index search codes used  
8  
9 for this study include HICDA (Mayo's modified version of the Hospital Adaptation of the  
10  
11 Internal Classification of Diseases, used at Mayo since 1975) and ICD-9 codes. Each  
12  
13 preliminary case was reviewed to ascertain cases that met the enrollment criteria,  
14  
15 including 1) Olmsted County residency at the index date and one year prior to index  
16  
17 date, with 2) research authorization, and 3) pathology confirmed glioma cases [e.g.,  
18  
19 astrocytoma, oligodendroglioma, gliomatosis cerebri, mixed gliomas (oligoastrocytoma),  
20  
21 and glioblastoma] of brain and spinal cord. The index date was defined as the date of  
22  
23 glioma diagnosis by pathology reporting. World Health Organization (WHO)  
24  
25 classification of primary brain tumors according to histology and grade was applied (i.e.,  
26  
27 Grade I, II-III, Grade IV).(17)  
28  
29  
30  
31  
32

33 The exclusion criteria included: 1) non-Olmsted County residents at or one year  
34  
35 prior to index date, 2) individuals without research authorization, 3) insufficient medical  
36  
37 records for determining case and exposure status, 4) non-glioma tumor types (e.g.,  
38  
39 recurrent glioma, metastatic brain tumor, ependymoma, and non-glial brain tumor [e.g.,  
40  
41 meningioma]), 5) glioma-related hereditary syndrome (e.g., tuberous sclerosis,  
42  
43 neurofibromatosis types 1 and 2), 6) absence of a tissue diagnosis, and 7) clinical  
44  
45 conditions making asthma ascertainment difficult (see Table 1).  
46  
47  
48  
49  
50

### 51 *Selection of Controls*

52  
53  
54  
55  
56  
57  
58  
59  
60

1  
2  
3 Two controls per case, matched based upon birth year, sex, and registration  
4 year, to ensure similar exposure to healthcare between cases and controls, were  
5 identified in the REP database. The first cohort of controls included subjects selected  
6 from the population in Olmsted County who did not have any history of glioma by  
7 HICDA and ICD-9 codes for initial screening confirmed by medical record review  
8 (“community control”). The second controls were subjects who had undergone brain or  
9 neck imaging, identified by CPT codes completed within one year of their corresponding  
10 case diagnosis, who had normal findings (“MRI control”). The index date for control was  
11 same as the one of their corresponding case. Controls were held to the same  
12 enrollment and exclusion criteria as cases. Reasons for MRI imaging among the MRI  
13 controls were reviewed and reported (eTable 2).  
14  
15  
16  
17  
18  
19  
20  
21  
22  
23  
24  
25  
26  
27  
28

### 29 *Asthma Ascertainment*

30  
31 We determined asthma status prior to the index date for both cases and controls  
32 according to predetermined asthma criteria (PAC) outlined in Table 1. Both definite and  
33 probable asthma statuses were considered as asthma as most probable asthma  
34 became definite asthma over time(18). This asthma criteria was originally developed by  
35 Drs. John Yunginger and Charles Reed(18) and has shown excellent construct validity  
36 and reliability (0.72-0.92) of the criteria (18-21). The onset date of asthma (asthma  
37 inception date) by PAC, was defined as the earliest constellation of symptoms found in  
38 the medical record that met the PAC.  
39  
40  
41  
42  
43  
44  
45  
46  
47  
48  
49

50 Active (or current) asthma was defined as the presence of any asthma-related events,  
51 including asthma symptoms (e.g., wheezing, night cough, dyspnea), use of asthma  
52 medications (e.g. short-acting beta agonists, inhaled corticosteroids, leukotriene  
53  
54  
55  
56  
57  
58  
59  
60

1  
2  
3 inhibitors), and/or outpatient, inpatient or emergency department (ED) visits for asthma  
4  
5 within 12 months of the index date. Poorly controlled asthma was defined as the  
6  
7 presence of any asthma symptoms, use of systemic corticosteroid for asthma  
8  
9 symptoms, or unscheduled visits for asthma, including ED or hospitalization for asthma,  
10  
11 within six months prior to index date (22).  
12  
13

14  
15 For those patients with an electronic medical record (EMR) at Mayo Clinic  
16  
17 available since 1997, we used a natural language processing (NLP) algorithm to  
18  
19 determine PAC (NLP-PAC; automatic chart review for EMR by computer). This was  
20  
21 developed and validated for automatic chart review for determining PAC by computer  
22  
23 and the details have been recently reported (23). Briefly, validation performance of NLP-  
24  
25 PAC was promising with 97%, 95%, 90%, and 98% for sensitivity, specificity, positive  
26  
27 predictive value, and negative predictive value of NLP algorithm against manual chart  
28  
29 review. This NLP-PAC algorithm has been externally validated by assessing validity in a  
30  
31 different study setting (Sioux Falls, South Dakota) (24)  
32  
33  
34  
35  
36  
37

### 38 Other variables

39  
40 Demographics including sex, age, race and clinical characteristics including family  
41  
42 history of asthma, and a physician diagnosis of other atopic conditions (eczema and  
43  
44 allergic rhinitis) were reported. A family history of asthma, smoking status within 3  
45  
46 months prior to index date (second-hand smoking included for pediatric population),  
47  
48 pneumococcal and seasonal influenza vaccine status as a surrogate marker for access  
49  
50 to health care service, co-morbid conditions (history of epilepsy, stroke or transient  
51  
52 ischemic attack (TIA), rheumatoid arthritis, lupus erythematosus, multiple sclerosis, and  
53  
54  
55  
56  
57  
58  
59  
60

1  
2  
3 diabetes) were collected by abstractors. Factors related to socioeconomic status (SES)  
4  
5 were measured using an individual-level housing-based socioeconomic status measure  
6  
7 we developed and validated, called HOUSES. (25, 26) This data was formulated as  
8  
9 standardized z-scores based on the address information at index date using real  
10  
11 property data (i.e. value, size, number of bedrooms and bathrooms) after  
12  
13 geocoding.(25) Higher HOUSES values equate to higher socioeconomic status.  
14  
15  
16  
17  
18

### 19 Statistical Analysis

20  
21 We summarized the characteristics of cases and controls using descriptive statistics.  
22  
23 We performed matched analysis with conditional logistic regression to determine the  
24  
25 association between asthma status and risk of glioma. Conditional logistic regression  
26  
27 models were used to estimate odds ratios (OR) and their corresponding 95%  
28  
29 confidence intervals (95% CIs). We used the Greenland entry criteria for multivariable  
30  
31 analysis ( $p < 0.20$  based on univariate analysis)(27). We also looked at subgroups (i.e.,  
32  
33 stratified by tumor grade) differences between groups although no formal comparisons  
34  
35 were made because of the small sample sizes. All analyses were performed using SAS  
36  
37 statistical software package (Ver 9.4; SAS Institute, Inc., Cary, NC).  
38  
39  
40  
41  
42  
43  
44  
45

## 46 **RESULTS**

### 47 Study subjects

48  
49 A total of 567 patients were found in the Mayo Clinic Tumor Registry or the Rochester  
50  
51 Epidemiology Project (REP) with a diagnosis code for glioma. Of these, 432 were  
52  
53  
54  
55  
56  
57  
58  
59  
60

1  
2  
3 excluded for not meeting the inclusion criteria or meeting the exclusion criteria, with 135  
4  
5 as our final cases (eTable 3).  
6  
7  
8  
9

10 The sociodemographic characteristics are summarized in Table 2. Overall, cases and  
11 controls (MRI and community) were similar except for smoking exposure. Glioma cases  
12 were less likely to have a history of smoking exposure (OR [95% CI]: 0.6 [0.4-1.0]).  
13  
14 When we compared each control set (i.e., community controls and MRI controls) with  
15 cases in terms of socioeconomic status (HOUSES) and access to health care (seasonal  
16 flu vaccine and PPSV23), we found MRI controls were more similar to cases than  
17 population controls. This suggests that MRI controls may be more representative of the  
18 source population to compare against the glioma cases in this study. Reasons for MRI  
19 imaging among the MRI control group are summarized in eTable 2, and these reasons  
20 seem to unlikely affect our study results. With regard to SES, median HOUSES, given  
21 as a z score, among cases was -0.2 (IQR: -1.7-2.3) which tended to be higher than MRI  
22 controls (median [IQR]: -0.8 [-2.6-2.3]), although not significant (P=0.17).  
23  
24  
25  
26  
27  
28  
29  
30  
31  
32  
33  
34  
35  
36  
37  
38  
39

#### 40 Comparison of prevalence of asthma between glioma cases and controls

41  
42 In the combined control set, there was no association between asthma and risk of  
43 glioma (OR [95%CI]: 0.74 [0.41-1.31], P=.30). However, 21 (16%) of the 135 cases had  
44 asthma, whereas 36 (27%) of the 135 MRI controls and 17 (13%) of the 135 community  
45 controls had asthma (OR [95%CI]: 0.48 [0.26-0.91]; p=0.03 for MRI controls and OR  
46  
47 [95%CI]: 1.28 [0.64-2.59]; p=0.48 for community controls; see Table 3).  
48  
49  
50  
51  
52  
53  
54  
55  
56  
57  
58  
59  
60

1  
2  
3 Active asthma (OR 0.40, 0.17-0.93) was associated with a stronger inverse association  
4 with glioma risk compared to inactive asthma (0.58, 0.26-1.28) when using non-  
5 asthmatic group as the reference group. Poorly controlled asthma (0.1, 0.02-1.1)  
6 showed similar effect, but not reached statistical significance. We assessed the  
7 association of asthma status with cases (vs. MRI controls) after adjusting for smoking  
8 exposure and HOUSES, and found asthma was still protective of glioma but only  
9 approached, but did not reach, statistical significance (OR [95%CI]: 0.55 [0.28, 1.08]; p  
10 =0.08) (Table 4). When we stratified cases by WHO grade (I [n=19], II-III [n=40], and IV  
11 [n=76]), glioma cases were less likely to have a history of asthma compared to MRI  
12 controls in all grades (16% [cases] vs. 47% (0.21, 0.05-0.96) [MRI controls], 18% vs.  
13 30% (0.50, 0.17-1.43), 15% vs. 20% (0.69, 0.29-1.62)for Grade I, II-III, and IV,  
14 respectively)

### 30 Comparison of prevalence of other comorbidities between glioma cases and controls

31  
32 Neither other atopic conditions (e.g., eczema, allergic rhinitis) nor family history of  
33 asthma was associated with risk of glioma in either set of controls (Table 3). Stroke or  
34 TIA was significantly associated with risk of glioma in comparison with either control  
35 group, but diabetes was not. Other comorbidities assessed such as epilepsy,  
36 rheumatoid arthritis, systemic lupus erythematosus, and multiple sclerosis were very  
37 rare in our cohort and were not analyzed.

## 47 **DISCUSSION**

48  
49 In this study, using two different control sets, while asthma tends to be inversely  
50 associated with the risk of glioma based on MRI controls, such association was not  
51 supported in community controls. As MRI controls were more similar to cases (than  
52  
53  
54  
55  
56  
57  
58  
59  
60



1  
2  
3 community controls), our study results may uphold previous study results supporting an  
4  
5 inverse association between asthma and risk of glioma. At the same time, these  
6  
7 differential results depending on controls account for inconsistent results and their  
8  
9 source (selection bias).  
10

11  
12  
13  
14 Patients with asthma may seek health care more often than those without asthma,  
15  
16 resulting in an increased chance of detecting glioma (and other health outcomes)  
17  
18 (detection bias),(28) and we tried to reduce detection bias by enrolling MRI-proven  
19  
20 controls (similar chance for detecting glioma between cases and controls). If detection  
21  
22 bias occurred to our, one would expect an increased detection of asthma among MRI  
23  
24 controls (e.g., a marker for care seeking) leading to a null association and a lower  
25  
26 detection of asthma among community controls resulting in a positive association  
27  
28 between asthma and risk of glioma. . However, our study results were contrary to this  
29  
30 anticipation (i.e., an inverse association between asthma and the risk of glioma using  
31  
32 MRI controls and no association in community controls), and thus, MRI controls might  
33  
34 negate potential detection bias. In addition, as MRI controls are more similar to glioma  
35  
36 cases in terms of clinical and socioeconomic variables, we believe MRI controls may be  
37  
38 more representative for a source population from who glioma cases were drawn.  
39

40  
41 To minimize misclassification bias for asthma status from self-report or ICD codes, we  
42  
43 utilized an objective method for asthma ascertainment by applying predetermined  
44  
45 asthma criteria (PAC) through comprehensive medical record review. Apart from the  
46  
47 association between asthma status and risk of glioma, in the analysis using MRI  
48  
49 controls, active asthma showed a more protective effect than inactive asthma and  
50  
51  
52  
53  
54  
55  
56  
57  
58  
59  
60

1  
2  
3 similarly poorly controlled asthma posed a more protective effect than not-poorly  
4 controlled asthma, although it did not reach statistical significance. Therefore, overall,  
5  
6 our results on an inverse association between asthma and the risk of glioma based on  
7  
8 MRI controls might uphold prior observations supporting such inverse associations.  
9

10  
11  
12  
13  
14 The relationship between asthma and risk of malignancy in general varies depending on  
15 the type of malignancy. For example, asthma has been shown to increase the risk for  
16 lung cancer while inverse association of asthma with multiple tumors has been reported  
17 including pancreatic or stomach cancer, acute lymphoblastic leukemia, gliomas, non-  
18 Hodgkin's lymphoma, and even colorectal cancer(29, 30). Hyperactive immune systems  
19 in patients with allergic disorders could cause a lower incidence of cancers(31). In fact,  
20 presence of any allergic disorder (eczema, allergic rhinitis or asthma) in studies with  
21 twins or similar genetic and environmental factors have demonstrated lower association  
22 with gliomas(32). However, in our study, atopic conditions other than asthma were not  
23 associated with the risk of glioma. It is uncertain whether this lack of association is due  
24 to a methodological issue as these conditions were determined by ICD codes instead of  
25 predetermined criteria as used in asthma. Along these lines, a family history of asthma  
26 as a marker for shared genetics or environment (33) was not associated with the risk of  
27 glioma in our study which is consistent with the literature (34, 35).  
28  
29  
30  
31  
32  
33  
34  
35  
36  
37  
38  
39  
40  
41  
42  
43  
44  
45  
46  
47  
48

49 The mechanisms underlying the potential inverse association is unknown. It is  
50 important to determine which one (asthma vs. its associated risk factors [i.e.,  
51 confounders]) is responsible for this observed potential inverse association. As our  
52  
53  
54  
55  
56  
57  
58  
59  
60

1  
2  
3 study is epidemiological and focused on clarification of inconsistent results of the  
4  
5 literature, this study question needs to be addressed in the future.. Literature suggests  
6  
7 that immunoglobulin E plays a role in reducing the risk of cancers and use of IgE  
8  
9 monoclonal antibodies for the passive immunotherapy in murine models has been found  
10  
11 to kill tumor cells in multiple previous studies via antibody dependent cellular  
12  
13 toxicity(36),(37). Along these lines, cytokines associated with Th2-immune responses  
14  
15 have shown anti-tumor activity(38). For example, IL-5 which is a cytokine produced by  
16  
17 lymphoid cells has been found to recruit eosinophils and create a microenvironment that  
18  
19 prevents tumor formation in the lung. However, whether this type of anti-tumor activity is  
20  
21 applicable to glioma needs to be studied. Though the underlying mechanisms remain  
22  
23 poorly understood, our work clarified the inconsistency of the literature on the  
24  
25 association between asthma and risk of glioma and provides an insight into a potential  
26  
27 inverse association between asthma and risk of glioma.  
28  
29  
30  
31  
32  
33

34 Our study also has some inherent limitations as a retrospective study. We did not  
35  
36 include laboratory or lung function data to measure Th2 immune responses or other  
37  
38 inflammatory responses, which might help us to discern the study results. Our study  
39  
40 was limited due to a small number of glioma cases even if our study included all eligible  
41  
42 population-based cases. These study results need to be replicated with a larger number  
43  
44 of glioma cases in future studies. As our study setting mostly consists of Caucasian  
45  
46 patients, generalizability of our study results to other settings or ethnic groups needs to  
47  
48 be cautious. Our study also has important strengths. The study setting has unique  
49  
50 advantages, including a self-contained health care environment and a medical record  
51  
52 linkage system. This is also a population-based study design, which minimizes a  
53  
54  
55  
56  
57  
58  
59  
60

1  
2  
3 selection bias. In addition, as we only included incident cases of glioma and determined  
4  
5 index date of asthma as well, we were able to assess temporality on the relationship  
6  
7 between asthma and risk of glioma. We used two sets of controls to mitigate or assess  
8  
9 detection bias as described above. In addition, ascertainment of asthma status by  
10  
11 using the PAC was performed independent of asthma status by a physician diagnosis of  
12  
13 asthma, which minimized an observational bias.  
14  
15  
16  
17  
18

## 19 **Conclusion**

20  
21 Our study results suggest that asthma may pose a protective effect on the risk of  
22  
23 developing glioma but the results need to be replicated in a larger study. In addition,  
24  
25 our study results clarify the rationale for the inconsistent results on the relationship  
26  
27 between asthma and risk of glioma.  
28  
29  
30  
31  
32

## 33 **ACKNOWLEDGEMENTS**

34  
35 We thank Mrs. Kelly Okeson for her administrative assistance.  
36  
37  
38  
39

## 40 **References:**

- 41  
42  
43 1. Ostrom QT, Gittleman H, Stetson L, Virk SM, Barnholtz-Sloan JS. Epidemiology of gliomas. *Cancer*  
44 *Treat Res.* 2015;163:1-14.  
45 2. Porter KR, McCarthy BJ, Freels S, Kim Y, Davis FG. Prevalence estimates for primary brain tumors  
46 in the United States by age, gender, behavior, and histology. *Neuro Oncol.* 2010;12(6):520-7.  
47 3. Baker GJ, Yadav VN, Motsch S, Koschmann C, Calinescu AA, Mineharu Y, et al. Mechanisms of  
48 glioma formation: iterative perivascular glioma growth and invasion leads to tumor progression, VEGF-  
49 independent vascularization, and resistance to antiangiogenic therapy. *Neoplasia.* 2014;16(7):543-61.  
50 4. Schoemaker MJ, Robertson L, Wigertz A, Jones ME, Hosking FJ, Feychting M, et al. Interaction  
51 between 5 genetic variants and allergy in glioma risk. *Am J Epidemiol.* 2010;171(11):1165-73.  
52 5. Lachance DH, Yang P, Johnson DR, Decker PA, Kollmeyer TM, McCoy LS, et al. Associations of  
53 high-grade glioma with glioma risk alleles and histories of allergy and smoking. *Am J Epidemiol.*  
54 2011;174(5):574-81.  
55  
56  
57  
58  
59  
60

6. Disney-Hogg L, Cornish AJ, Sud A, Law PJ, Kinnersley B, Jacobs DI, et al. Impact of atopy on risk of glioma: a Mendelian randomisation study. *BMC Med.* 2018;16(1):42.
7. Gomez GG, Kruse CA. Mechanisms of malignant glioma immune resistance and sources of immunosuppression. *Gene Ther Mol Biol.* 2006;10(A):133-46.
8. Wiemels JL, Wilson D, Patil C, Patoka J, McCoy L, Rice T, et al. IgE, allergy, and risk of glioma: update from the San Francisco Bay Area Adult Glioma Study in the temozolomide era. *Int J Cancer.* 2009;125(3):680-7.
9. Chen C, Xu T, Chen J, Zhou J, Yan Y, Lu Y, et al. Allergy and risk of glioma: a meta-analysis. *Eur J Neurol.* 2011;18(3):387-95.
10. Dobbins SE, Hosking FJ, Shete S, Armstrong G, Swerdlow A, Liu Y, et al. Allergy and glioma risk: test of association by genotype. *Int J Cancer.* 2011;128(7):1736-40.
11. Amirian ES, Zhou R, Wrensch MR, Olson SH, Scheurer ME, Il'yasova D, et al. Approaching a Scientific Consensus on the Association between Allergies and Glioma Risk: A Report from the Glioma International Case-Control Study. *Cancer Epidemiol Biomarkers Prev.* 2016;25(2):282-90.
12. Brenner AV, Linet MS, Fine HA, Shapiro WR, Selker RG, Black PM, et al. History of allergies and autoimmune diseases and risk of brain tumors in adults. *International journal of cancer Journal international du cancer.* 2002;99(2):252-9.
13. Schwartzbaum J, Jonsson F, Ahlbom A, Preston-Martin S, Lonn S, Soderberg KC, et al. Cohort studies of association between self-reported allergic conditions, immune-related diagnoses and glioma and meningioma risk. *Int J Cancer.* 2003;106(3):423-8.
14. Cardis E, Richardson L, Deltour I, Armstrong B, Feychting M, Johansen C, et al. The INTERPHONE study: design, epidemiological methods, and description of the study population. *Eur J Epidemiol.* 2007;22(9):647-64.
15. Wigertz A, Lonn S, Schwartzbaum J, Hall P, Auvinen A, Christensen HC, et al. Allergic conditions and brain tumor risk. *Am J Epidemiol.* 2007;166(8):941-50.
16. Rocca WA, Yawn BP, St Sauver JL, Grossardt BR, Melton LJ, 3rd. History of the Rochester Epidemiology Project: half a century of medical records linkage in a US population. *Mayo Clin Proc.* 2012;87(12):1202-13.
17. Louis DN, Perry A, Reifenberger G, von Deimling A, Figarella-Branger D, Cavenee WK, et al. The 2016 World Health Organization Classification of Tumors of the Central Nervous System: a summary. *Acta Neuropathol.* 2016;131(6):803-20.
18. Yunginger J, Reed, CE, O'Connell, EJ, Melton, J, O'Fallon, WM, Silverstein, MD. A Community-based Study of the Epidemiology of Asthma: Incidence Rates, 1964-1983. *Am Rev Respir Dis.* 1992;146:888-94.
19. Juhn YJ, Kita H, Yawn BP, Boyce TG, Yoo KH, McGree ME, et al. Increased risk of serious pneumococcal disease in patients with asthma. *J Allergy Clin Immunol.* 2008;122(4):719-23.
20. Kwon HJ, Bang DW, Kim EN, Wi CI, Yawn BP, Wollan PC, et al. Asthma as a risk factor for zoster in adults: A population-based case-control study. *J Allergy Clin Immunol.* 2016;137(5):1406-12.
21. Kim BS, Mehra S, Yawn B, Grose C, Tarrell R, Lahr B, et al. Increased risk of herpes zoster in children with asthma: a population-based case-control study. *J Pediatr.* 2013;163(3):816-21.
22. Reddel HK, Taylor DR, Bateman ED, Boulet LP, Boushey HA, Busse WW, et al. An official American Thoracic Society/European Respiratory Society statement: asthma control and exacerbations: standardizing endpoints for clinical asthma trials and clinical practice. *Am J Respir Crit Care Med.* 2009;180(1):59-99.
23. Wi CI, Sohn S, Rolfes MC, Seabright A, Ryu E, Voge G, et al. Application of a Natural Language Processing Algorithm to Asthma Ascertainment. An Automated Chart Review. *Am J Respir Crit Care Med.* 2017;196(4):430-7.

- 1
- 2
- 3
- 4 24. Sohn S, Wi CI, Juhn YJ, Liu H. Analysis of Clinical Variations in Asthma Care Documented in
- 5 Electronic Health Records Between Staff and Resident Physicians. *Stud Health Technol Inform.*
- 6 2017;245:1170-4.
- 7 25. Juhn YJ, Beebe TJ, Finnie DM, Sloan J, Wheeler PH, Yawn B, et al. Development and initial testing
- 8 of a new socioeconomic status measure based on housing data. *J Urban Health.* 2011;88(5):933-44.
- 9 26. Wi CI, St Sauver JL, Jacobson DJ, Pendegraft RS, Lahr BD, Ryu E, et al. Ethnicity, Socioeconomic
- 10 Status, and Health Disparities in a Mixed Rural-Urban US Community-Olmsted County, Minnesota. *Mayo*
- 11 *Clin Proc.* 2016;91(5):612-22.
- 12 27. Greenland S. Modeling and variable selection in epidemiologic analysis. *Am J Public Health.*
- 13 1989;79(3):340-9.
- 14 28. Horwitz RI, Feinstein AR, Horwitz SM, Robboy SJ. Necropsy diagnosis of endometrial cancer and
- 15 detection-bias in case/control studies. *Lancet.* 1981;2(8237):66-8.
- 16 29. Cui Y, Hill AW. Atopy and Specific Cancer Sites: a Review of Epidemiological Studies. *Clin Rev*
- 17 *Allergy Immunol.* 2016;51(3):338-52.
- 18 30. El-Zein M, Parent ME, Kâ K, Siemiatycki J, St-Pierre Y, Rousseau MC. History of asthma or eczema
- 19 and cancer risk among men: a population-based case-control study in Montreal, Quebec, Canada. *Ann*
- 20 *Allergy Asthma Immunol.* 2010;104(5):378-84.
- 21 31. Dunn GP, Bruce AT, Ikeda H, Old LJ, Schreiber RD. Cancer immunoediting: from
- 22 immunosurveillance to tumor escape. *Nat Immunol.* 2002;3(11):991-8.
- 23 32. Il'yasova D, McCarthy B, Marcello J, Schildkraut JM, Moorman PG, Krishnamachari B, et al.
- 24 Association between glioma and history of allergies, asthma, and eczema: a case-control study with
- 25 three groups of controls. *Cancer Epidemiol Biomarkers Prev.* 2009;18(4):1232-8.
- 26 33. Cárdenas-Roldán J, Rojas-Villarraga A, Anaya JM. How do autoimmune diseases cluster in
- 27 families? A systematic review and meta-analysis. *BMC Med.* 2013;11:73.
- 28 34. Schoemaker MJ, Swerdlow AJ, Hepworth SJ, McKinney PA, van Tongeren M, Muir KR. History of
- 29 allergies and risk of glioma in adults. *Int J Cancer.* 2006;119(9):2165-72.
- 30 35. Roncarolo F, Infante-Rivard C. Asthma and risk of brain cancer in children. *Cancer Causes*
- 31 *Control.* 2012;23(4):617-23.
- 32 36. Jensen-Jarolim E, Achatz G, Turner MC, Karagiannis S, Legrand F, Capron M, et al.
- 33 *AllergoOncology: the role of IgE-mediated allergy in cancer. Allergy.* 2008;63(10):1255-66.
- 34 37. Singer J, Jensen-Jarolim E. IgE-based Immunotherapy of Cancer -A Comparative Oncology
- 35 Approach. *J Carcinog Mutagen.* 2014;5(3):1000176.
- 36 38. Ikutani M, Yanagibashi T, Ogasawara M, Tsuneyama K, Yamamoto S, Hattori Y, et al.
- 37 Identification of innate IL-5-producing cells and their role in lung eosinophil regulation and antitumor
- 38 immunity. *J Immunol.* 2012;188(2):703-13.
- 39 39. Schlehofer B, Siegmund B, Linseisen J, Schuz J, Rohrmann S, Becker S, et al. Primary brain
- 40 tumours and specific serum immunoglobulin E: a case-control study nested in the European Prospective
- 41 Investigation into Cancer and Nutrition cohort. *Allergy.* 2011;66(11):1434-41.
- 42 40. Calboli FC, Cox DG, Buring JE, Gaziano JM, Ma J, Stampfer M, et al. Prediagnostic plasma IgE
- 43 levels and risk of adult glioma in four prospective cohort studies. *J Natl Cancer Inst.* 2011;103(21):1588-
- 44 95.
- 45
- 46
- 47
- 48
- 49
- 50
- 51
- 52
- 53
- 54
- 55
- 56
- 57
- 58
- 59

### Table 1. Predetermined Asthma Criteria

Patients were considered to have *definite* asthma if a physician had made a diagnosis of asthma and/or if each of the following three conditions were present, and they were considered to have *probable* asthma if only the first two conditions were present:

1. History of cough with wheezing, and/or dyspnea, OR history of cough and/or dyspnea plus wheezing on examination,
2. Substantial variability in symptoms from time to time or periods of weeks or more when symptoms were absent, and
3. Two or more of the following:
  - Sleep disturbance by nocturnal cough and wheeze
  - Nonsmoker (14 years or older)
  - Nasal polyps
  - Blood eosinophilia higher than 300/uL
  - Positive wheal and flare skin tests OR elevated serum IgE
  - History of hay fever or infantile eczema OR cough, dyspnea, and wheezing regularly on exposure to an antigen
  - Pulmonary function tests showing one FEV<sub>1</sub> or FVC less than 70% predicted and another with at least 20% improvement to an FEV<sub>1</sub> of higher than 70% predicted OR methacholine challenge test showing 20% or greater decrease in FEV<sub>1</sub>
  - Favorable clinical response to bronchodilator

Patients were excluded from the study if any of these conditions were present:

- Pulmonary function tests that showed FEV<sub>1</sub> to be consistently below 50% predicted or diminished diffusion capacity
- Tracheobronchial foreign body at or about the incidence date
- Hypogammaglobulinemia (IgG less than 2.0 mg/mL) or other immunodeficiency disorder
- Wheezing occurring only in response to anesthesia or medications

The following diseases excluded the patient from study if they occurred before the incidence date:

- Bullous emphysema or pulmonary fibrosis on chest radiograph
  - PiZZ alpha<sub>1</sub>-antitrypsin
  - Cystic fibrosis
  - Other major chest disease such as juvenile kyphoscoliosis or bronchiectasis
- FVC forced vital capacity; FEV<sub>1</sub>, forced expiratory volume in 1 sec.

**Table 2. Sociodemographic characteristics of study subjects**

|                                    | Cases<br>(n=135) | All controls<br>(n=270) | OR (95%CI)<br>for all<br>controls | MRI controls<br>(n=135) | OR (95%CI) for<br>MRI controls | Community<br>controls<br>(n=135) | OR (95%CI) for<br>Community<br>controls |
|------------------------------------|------------------|-------------------------|-----------------------------------|-------------------------|--------------------------------|----------------------------------|-----------------------------------------|
| <b>Age, years, median (IQR)</b>    | 53<br>(32, 68)   | 53<br>(32, 68)          | -                                 | 53<br>(32, 68)          | -                              | 53<br>(32, 68)                   | -                                       |
| <b>Female, n (%)</b>               | 61 (45)          | 122 (45)                | -                                 | 61 (45)                 | -                              | 61 (45)                          | -                                       |
| <b>White, n (%)</b>                | 126 (93)         | 242 (90)                | 1.7 (0.7-3.7)                     | 123 (91)                | 1.4 (0.6-3.4)                  | 119 (88)                         | 2.2 (0.8-5.7)                           |
| <b>Education</b>                   |                  |                         |                                   |                         |                                |                                  |                                         |
| <b>Missing</b>                     | 20               | 13                      |                                   | 331 (23)                | -                              | 10                               |                                         |
| <b>High School or less</b>         | 31 (27)          | 78 (30)                 | 0.7 (0.4-1.3)                     | 37 (28)                 | 1.5 (0.6-3.3)                  | 47 (38)                          | 0.3 (0.1-0.7)**                         |
| <b>Some college</b>                | 36 (31)          | 70 (27)                 | 0.8 (0.5-1.5)                     | 24 (18)                 | 1.0 (0.5-1.8)                  | 33 (26)                          | 0.5 (0.2-1.1)                           |
| <b>College completion</b>          | 13 (11)          | 47 (18)                 | 0.4 (0.2-1.0)**                   | 40 (30)                 | 0.6 (0.2-1.3)                  | 23 (18)                          | 0.3 (0.1-0.8)**                         |
| <b>Graduate education</b>          | 35 (30)          | 62 (24)                 | (ref)                             |                         | (ref)                          | 22 (18)                          | (ref)                                   |
| <b>HOUSES, Z (median, IQR)</b>     | -0.2 (-1.7, 2.3) | -0.7 (-2.7, 1.9)        |                                   | -0.8 (-2.6, 2.3)        |                                | -0.6 (-2.7, 1.8)                 |                                         |
| <b>HOUSES, n (%)</b>               |                  |                         |                                   |                         |                                |                                  |                                         |
| <b>Missing</b>                     | 526 (20)         | 1271 (28)               | -                                 | 6                       | -                              | 6                                | -                                       |
| <b>Q1 (lowest SES)</b>             | 33 (25)          | 64 (25)                 | 0.6 (0.3-1.1)                     | 38 (30)                 | 0.5 (0.3-1.2)                  | 33 (26)                          | 0.6 (0.3-1.3)                           |
| <b>Q2</b>                          | 35 (27)          | 62 (24)                 | 0.9 (0.5-1.6)                     | 30 (23)                 | 0.9 (0.5-1.8)                  | 34 (26)                          | 0.8 (0.4-1.7)                           |
| <b>Q3</b>                          | 36 (28)          | 61 (24)                 | 0.9 (0.5-1.7)                     | 26 (20)                 | 1.1 (0.6-2.1)                  | 36 (28)                          | 0.8 (0.4-1.5)                           |
| <b>Q4</b>                          |                  |                         | (ref)                             | 35 (27)                 | (ref)                          | 26 (20)                          | (ref)                                   |
| <b>Seasonal flu vaccine, n (%)</b> | 63 (47)          | 112 (42)                | 1.3 (0.8-2.0)                     | 62 (46)                 | 1.0 (0.6-1.7)                  | 50 (37)                          | 1.7 (1.0-3.1)*                          |
| <b>PPSV23<sup>a</sup>, n (%)</b>   | 33 (24)          | 69 (26)                 | 0.9 (0.5-1.7)                     | 39 (29)                 | 0.7 (0.3-1.4)                  | 30 (22)                          | 1.2 (0.6-2.5)                           |
| <b>Smoking exposure, n (%)</b>     |                  |                         |                                   |                         |                                |                                  |                                         |
| <b>Undocumented</b>                | 4 (3)            | 15 (6)                  | 0.5 (0.1-1.4)                     | 3 (2)                   | 1.1 (0.2-5.1)                  | 12 (9)                           | 0.2 (0.1-0.9)**                         |
| <b>Yes</b>                         | 48 (36)          | 119 (44)                | 0.6 (0.4-1.0)*                    | 67 (50)                 | 0.5 (0.3-0.9)**                | 52 (39)                          | 0.8 (0.4-1.3)                           |
| <b>No</b>                          | 83 (62)          | 136 (50)                | (ref)                             | 65 (48)                 | (ref)                          | 71 (53)                          | (ref)                                   |

\*p<0.1, \*\*p<0.05 ; <sup>a</sup> Pneumococcal polysaccharide vaccine 23 Percentages may not add up to 100 due to rounding Odds ratios are not presented for matching variables



**Table 3. Association of asthma and other atopic conditions with cases compared to controls**

|                                        | <b>Cases<br/>(n=135)</b> | <b>All<br/>controls<br/>(n=270)</b> | <b>OR (95%CI)<br/>for all<br/>controls</b> | <b>MRI<br/>controls<br/>(n=135)</b> | <b>OR (95%CI)<br/>for MRI<br/>controls</b> | <b>Community<br/>controls<br/>(n=135)</b> | <b>OR (95%CI)<br/>for<br/>Community<br/>controls</b> |
|----------------------------------------|--------------------------|-------------------------------------|--------------------------------------------|-------------------------------------|--------------------------------------------|-------------------------------------------|------------------------------------------------------|
| <b>Asthma PAC<sup>a</sup>, n (%)</b>   | 21 (16)                  | 53 (20)                             | 0.7 (0.4-1.3)                              | 36 (27)                             | 0.5 (0.3-0.9)**                            | 17 (13)                                   | 1.3 (0.6-2.6)                                        |
| <b>Asthma activity, n (%)</b>          |                          |                                     |                                            |                                     |                                            |                                           |                                                      |
| <b>No asthma</b>                       | 114 (84)                 | 217 (80)                            | (ref)                                      | 99 (73)                             | (ref)                                      | 118 (87)                                  | (ref)                                                |
| <b>Inactive asthma</b>                 | 11 (8)                   | 24 (9)                              | 0.9 (0.4-1.8)                              | 16 (12)                             | 0.6 (0.3-1.3)                              | 8 (6)                                     | 1.4 (0.5-3.8)                                        |
| <b>Active asthma</b>                   | 10 (7)                   | 29 (11)                             | 0.6 (0.3-1.4)                              | 20 (15)                             | 0.4 (0.2-0.9)**                            | 9 (7)                                     | 1.1 (0.4-3.2)                                        |
| <b>Asthma control, n (%)</b>           |                          |                                     |                                            |                                     |                                            |                                           |                                                      |
| <b>No asthma</b>                       | 114 (84)                 | 217 (80)                            | (ref)                                      | 99 (73)                             | (ref)                                      | 118 (87)                                  | (ref)                                                |
| <b>Not poorly controlled asthma</b>    | 19 (14)                  | 43 (16)                             | 0.9 (0.5-1.6)                              | 29 (21)                             | 0.6 (0.3-1.1)                              | 14 (10)                                   | 1.5 (0.7-3.0)                                        |
| <b>Poorly controlled asthma</b>        | 1 (1)                    | 10 (4)                              | 0.2 (0.03-1.5)                             | 7 (5)                               | 0.1 (0.02-1.1)*                            | 3 (2)                                     | 0.3 (0.04-3.5)                                       |
| <b>Eczema, n (%)</b>                   | 11 (8)                   | 24 (9)                              | 0.9 (0.4-1.9)                              | 17 (13)                             | 0.6 (0.3-1.4)                              | 7 (5)                                     | 1.7 (0.6-4.6)                                        |
| <b>Allergic rhinitis, n (%)</b>        | 28 (21)                  | 53 (20)                             | 1.1 (0.6-1.8)                              | 30 (22)                             | 1.0 (0.5-1.6)                              | 23 (17)                                   | 1.3 (0.7-2.4)                                        |
| <b>Family history of asthma, n (%)</b> |                          |                                     |                                            | 36 (27)                             |                                            |                                           |                                                      |
| <b>Undocumented</b>                    | 34 (25)                  | 87 (32)                             | 0.5 (0.2-1.0)**                            | 15 (11)                             | 0.8 (0.4-1.8)                              | 51 (38)                                   | 0.4 (0.2- 0.9)**                                     |
| <b>Yes</b>                             | 12 (9)                   | 22 (8)                              | 1.0 (0.5-2.1)                              | 84 (62)                             | 0.8 (0.3-1.7)                              | 7 (5)                                     | 1.5 (0.5-4.1)                                        |
| <b>No</b>                              | 89 (66)                  | 161 (60)                            | (ref)                                      |                                     | (ref)                                      | 77 (57)                                   | (ref)                                                |

\*p<0.1, \*\*p<0.05 ; <sup>a</sup> Predetermined asthma criteria Percentages may not add up to 100 due to rounding Odds ratios are not presented for matching variables

**Table 4. Multivariable analysis: Cases vs. MRI Controls**

| Variable                                                | Comparison              | Adj. Odds Ratio | 95% CI      | P-value |
|---------------------------------------------------------|-------------------------|-----------------|-------------|---------|
| <b>Asthma PAC</b>                                       | Yes. Vs. No             | 0.55            | 0.28 - 1.08 | 0.08    |
| <b>Smoking History</b>                                  | Yes vs. No              | 0.51            | 0.28 - 0.92 | 0.08    |
|                                                         | Unknown vs. No          | 0.83            | 0.16 - 4.74 |         |
| <b>HOUSES in quartile (4<sup>th</sup>: highest SES)</b> | 1 <sup>st</sup> vs. 4th | 0.61            | 0.28 - 1.36 | 0.46    |
|                                                         | 2 <sup>nd</sup> vs. 4th | 0.97            | 0.48 - 1.96 |         |
|                                                         | 3 <sup>rd</sup> vs. 4th | 1.09            | 0.55 - 2.15 |         |

For peer review only

1  
2  
3  
4  
5  
6  
7  
8  
9  
10  
11  
12  
13  
14  
15  
16  
17  
18  
19  
20  
21  
22  
23  
24  
25  
26  
27  
28  
29  
30  
31  
32  
33  
34  
35  
36  
37  
38  
39  
40  
41  
42  
43  
44  
45  
46  
47

For peer review only

**eTable 1. Description of epidemiologic studies on asthma or atopic conditions and risk of glioma**

| Authors                       | Design                                           | Study subjects and source population                                                   | Definition of glioma                                                      | Independent variable                                                                                                                  | Results                                                                                                                                                                                                                                                                                                                                                                           | Conclusion                                                                                                                                                                                                                   |
|-------------------------------|--------------------------------------------------|----------------------------------------------------------------------------------------|---------------------------------------------------------------------------|---------------------------------------------------------------------------------------------------------------------------------------|-----------------------------------------------------------------------------------------------------------------------------------------------------------------------------------------------------------------------------------------------------------------------------------------------------------------------------------------------------------------------------------|------------------------------------------------------------------------------------------------------------------------------------------------------------------------------------------------------------------------------|
| <b>A. Inverse association</b> |                                                  |                                                                                        |                                                                           |                                                                                                                                       |                                                                                                                                                                                                                                                                                                                                                                                   |                                                                                                                                                                                                                              |
| Schlehofer, Europe, 2011(39)  | Nested case-control study                        | Case:275<br>Control: 963                                                               | Histologically proven cases of glioma                                     | IgE $\geq$ 0.35 kUA/L                                                                                                                 | 1. OR 0.73 (0.51-1.06) overall, 0.53 (0.30-0.95) in women<br>2. P for trend=0.04 (the lowest OR observed in sera with the highest IgE levels)                                                                                                                                                                                                                                     | A reduced risk for glioma with allergic sensitization                                                                                                                                                                        |
| Wigertz, Europe, 2007(15)     | 5 case-control studies (5 countries in Europe)   | Case:1527<br>Control:3309                                                              | ICD codes                                                                 | MD diagnosed atopic conditions (asthma, hay fever, eczema, food allergy)                                                              | For each atopic condition, OR 0.65–0.66 ( $p < 0.05$ in all) (current rather than past, except in asthma)                                                                                                                                                                                                                                                                         | A reduced risk for glioma primarily with current allergic conditions                                                                                                                                                         |
| Brenner, USA, 2002 (12)       | Case-control study                               | Case: 489<br>Control: 799                                                              | Histologically proven with ICD confirmation                               | MD diagnosed allergic conditions (asthma, hay fever, eczema)                                                                          | 1. Any allergy<br>a. Low-grade glioma OR 0.72 (0.47-1.10)<br>b. High-grade glioma OR 0.67 (0.5-0.89)<br>2. Asthma, OR 0.63 (0.43-0.92)<br>3. Hay fever, OR 0.97 (0.69-1.37)<br>4. Eczema, OR 0.76 (0.45-1.27)                                                                                                                                                                     | Reduced risk for glioma in those with asthma or any allergy                                                                                                                                                                  |
| Wiemels, USA, 2009 (8)        | Case-control study                               | Case: 535<br>Controls: 532                                                             | Histologically confirmed glioma                                           | In-person interviews and IgE measurement                                                                                              | Glioma patients reported significantly fewer allergies than controls (OR = 0.50, 95% CI: 0.36–0.70)                                                                                                                                                                                                                                                                               | The study described an inverse association of self-reported allergy and glioma                                                                                                                                               |
| Schwartzbaum, USA, 2003(13)   | Cohort studies                                   | Questionnaire Respondents:<br>Cohort 1: 14,535<br>Cohort 2: 29,573<br>Cohort 3: 52,067 | Swedish mortality and cancer registry                                     | Self-reported allergic diseases                                                                                                       | Allergies are inversely associated with glioma risk in Cohort I (Hazard ratio [HR] 0.45; 95% CI 0.19 –1.07) and among high grade (III and IV, HR 0.45; 95% CI 0.11–1.92) but not low grade (I and II, HR 2.60; 95% CI 0.86 –7.81) gliomas in Cohort II. In Cohort III, immune-related discharge diagnoses are also inversely associated with glioma (HR 0.46; 95% CI 0.14 –1.49). | There is no strong evidence against (and some for) the hypothesis that allergies reduce glioma risk.                                                                                                                         |
| <b>B. No association</b>      |                                                  |                                                                                        |                                                                           |                                                                                                                                       |                                                                                                                                                                                                                                                                                                                                                                                   |                                                                                                                                                                                                                              |
| Calboli, USA, 2011(40)        | 4 Cohort studies                                 | Case: 169<br>Controls: 520                                                             | Glioma cases from medical records, death certificates or pathology proven | Self-reported history of asthma<br>IgE measurement:<br>25-100kU/L: Borderline<br>>100kU/l: Elevated                                   | There was an inverse association of borderline statistical significance ( $P = .07$ ) for total IgE levels higher than clinically normal levels and risk of glioma (total IgE $\geq$ 25 vs <25 kU/L, odds ratio [OR] = 0.72, 95% CI = 0.51 to 1.04)                                                                                                                               | No statistically significant associations between allergy measurements and risk of glioma.                                                                                                                                   |
| Disney Hogg, UK, 2018 (6)     | Meta-analysis of Genome wide association studies | Cases: 12,488<br>Controls: 18169                                                       | Genome wide association studies dataset for glioma                        | Single nucleotide polymorphisms (SNPs) associated with atopic dermatitis, asthma and hay fever, IgE levels, and self-reported allergy | An inverse relationship between atopic dermatitis and glioma risk was found by inverse-variance weighting (OR 0.96, 95% confidence interval (CI) 0.93–1.00, $P = 0.041$ ) and maximum likelihood estimation (OR 0.96, 95% CI 0.94–0.99, $P = 0.003$ ),                                                                                                                            | Study results provide evidence for a causal protective effect of atopic dermatitis with GBM tumors, but do not provide evidence that asthma and hay fever, raised IgE levels, or self-reported allergy is protective against |

|                                             |                                                                   |                                              |                                                                     |                                                                                                                |                                                                                                                                                                                                                                                                                                                                                                                                           |                                                                                                                                                                                                                         |
|---------------------------------------------|-------------------------------------------------------------------|----------------------------------------------|---------------------------------------------------------------------|----------------------------------------------------------------------------------------------------------------|-----------------------------------------------------------------------------------------------------------------------------------------------------------------------------------------------------------------------------------------------------------------------------------------------------------------------------------------------------------------------------------------------------------|-------------------------------------------------------------------------------------------------------------------------------------------------------------------------------------------------------------------------|
|                                             |                                                                   |                                              |                                                                     |                                                                                                                | but not by weighted median estimate (OR 0.96, 95% CI 0.91–1.01, P = 0.114) or mode-based estimate (OR 0.97, 95% CI 0.92–1.02, P = 0.194)                                                                                                                                                                                                                                                                  | the risk of developing glioma                                                                                                                                                                                           |
| <b>C. Interaction / effect modification</b> |                                                                   |                                              |                                                                     |                                                                                                                |                                                                                                                                                                                                                                                                                                                                                                                                           |                                                                                                                                                                                                                         |
| Schoemaker, Europe, 2010 (4)                | 5 case-control studies (4 countries in Europe)                    | Case: 1029<br>Control: 1668                  | ICD codes                                                           | 1. MD diagnosed atopic conditions<br>2. 5 SNPs of glioma risk; rs4977756, 498872, 6010620, 4295627, 2736100,   | 1. For risk of glioma and any allergy, OR 0.66 (0.55-0.78)<br>2. For number of risk alleles and allergy, P<0.05 for 3 SNPs (rs4977756,498872,6010620)                                                                                                                                                                                                                                                     | Evidence for possible gene-environment interactions in glioma development                                                                                                                                               |
| Lachance, USA, 2011(5)                      | 3 case-control studies in USA                                     | Case:855 (high-grade glioma)<br>Control:1160 | Pathologically confirmed glioma cases                               | 1. MD diagnosed allergies<br>2. 10 SNPs of glioma risk; rs4809324, 4977756, 4295627, etc.                      | 1. rs4977756, OR 0.40 (0.28-0.58) without the allele of risk (SNP) vs. 0.76 (0.59-0.97) with the allele of risk SNP<br>2. rs4809324, OR 0.44(0.29-0.68) with the SNP vs. 0.68(0.54-0.86) without the SNP                                                                                                                                                                                                  | The inherited glioma risk variants in chromosome regions 9p21.3 (rs4977756) and 20q13.3 (rs4809324) may modify the inverse association of allergy and glioma                                                            |
| Dobbins, UK, 2010 (10)                      | US and UK based gene wide association studies. Case-control study | Cases: 1,878<br>Controls: 3,670              | Histologically confirmed or based on unequivocal diagnostic imaging | SNPs that have been validated in previous studies associated with atopy, allergy, asthma, eczema and hay fever | No significant association with glioma risk was seen between rs7130588 and rs1588265 in either case-control series. An increased risk of glioma was observed between the atopic risk allele of rs1420101 and glioma risk<br>A significant association between rs7216389 and glioma risk was shown in the combined dataset whereby an increased glioma risk was associated with the risk allele for asthma | This positive association between asthma and glioma is inconsistent. The inference from such a complex phenotype is not necessarily straightforward, and such observations could be a consequence of reverse causality. |

**eTable 2. Reasons for testing MRI among MRI negative controls (n=135)**

| <b>Pain (headache)</b> | <b>Stroke (ischemia)</b> | <b>Cranial nerve, vision/ hearing issue</b> | <b>Dementia (memory), psychiatric</b> | <b>Dizziness , syncope</b> | <b>Spell, seizure</b> | <b>Others*</b> | <b>Research</b> |
|------------------------|--------------------------|---------------------------------------------|---------------------------------------|----------------------------|-----------------------|----------------|-----------------|
| 31<br>(23%)            | 23<br>(17%)              | 22<br>(16.5%)                               | 13<br>(9.5%)                          | 13<br>(9.5%)               | 13<br>(9.5%)          | 10<br>(7.5%)   | 10<br>(7.5%)    |

\* Others include developmental concern pituitary concern, and deep brain stimulation.

For peer review only

1  
2  
3  
4  
5  
6  
7  
8  
9  
10  
11  
12  
13  
14  
15  
16  
17  
18  
19  
20  
21  
22  
23  
24  
25  
26  
27  
28  
29  
30  
31  
32  
33  
34  
35  
36  
37  
38  
39  
40  
41  
42  
43  
44  
45  
46  
47

**eTable3. Number of Cases and Controls after applying the exclusion criteria**

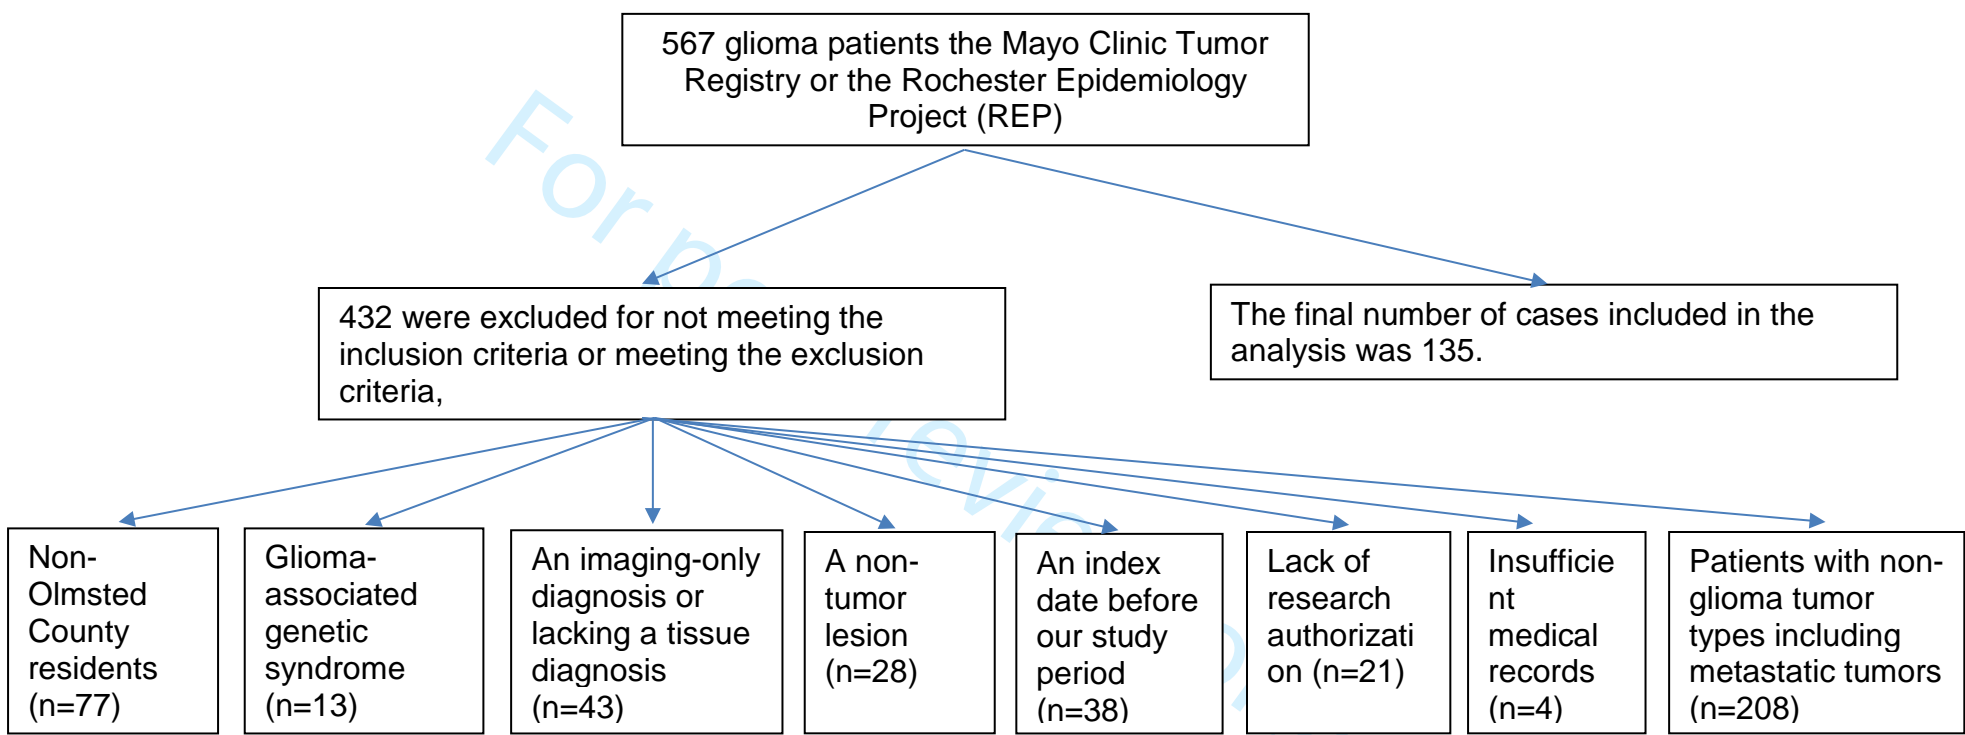

## STROBE (Strengthening The Reporting of OBservational Studies in Epidemiology) Checklist

A checklist of items that should be included in reports of observational studies. You must report the page number in your manuscript where you consider each of the items listed in this checklist. If you have not included this information, either revise your manuscript accordingly before submitting or note N/A.

**Note:** An Explanation and Elaboration article discusses each checklist item and gives methodological background and published examples of transparent reporting. The STROBE checklist is best used in conjunction with this article (freely available on the Web sites of PLoS Medicine at <http://www.plosmedicine.org/>, Annals of Internal Medicine at <http://www.annals.org/>, and Epidemiology at <http://www.epidem.com/>). Information on the STROBE Initiative is available at [www.strobe-statement.org](http://www.strobe-statement.org).

| Section and Item     | Item No. | Recommendation                                                                                                                                                                                                                                                                                                                                                                                                                                                                 | Reported on Page No. |
|----------------------|----------|--------------------------------------------------------------------------------------------------------------------------------------------------------------------------------------------------------------------------------------------------------------------------------------------------------------------------------------------------------------------------------------------------------------------------------------------------------------------------------|----------------------|
| Title and Abstract   | 1        | (a) Indicate the study's design with a commonly used term in the title or the abstract                                                                                                                                                                                                                                                                                                                                                                                         |                      |
|                      |          | (b) Provide in the abstract an informative and balanced summary of what was done and what was found                                                                                                                                                                                                                                                                                                                                                                            |                      |
| <b>Introduction</b>  |          |                                                                                                                                                                                                                                                                                                                                                                                                                                                                                |                      |
| Background/Rationale | 2        | Explain the scientific background and rationale for the investigation being reported                                                                                                                                                                                                                                                                                                                                                                                           |                      |
| Objectives           | 3        | State specific objectives, including any prespecified hypotheses                                                                                                                                                                                                                                                                                                                                                                                                               |                      |
| <b>Methods</b>       |          |                                                                                                                                                                                                                                                                                                                                                                                                                                                                                |                      |
| Study Design         | 4        | Present key elements of study design early in the paper                                                                                                                                                                                                                                                                                                                                                                                                                        |                      |
| Setting              | 5        | Describe the setting, locations, and relevant dates, including periods of recruitment, exposure, follow-up, and data collection                                                                                                                                                                                                                                                                                                                                                |                      |
| Participants         | 6        | (a) <i>Cohort study</i> —Give the eligibility criteria, and the sources and methods of selection of participants. Describe methods of follow-up<br><br><i>Case-control study</i> —Give the eligibility criteria, and the sources and methods of case ascertainment and control selection. Give the rationale for the choice of cases and controls<br><br><i>Cross-sectional study</i> —Give the eligibility criteria, and the sources and methods of selection of participants |                      |
|                      |          | (b) <i>Cohort study</i> —For matched studies, give matching criteria and number of exposed and unexposed<br><br><i>Case-control study</i> —For matched studies, give matching criteria and the number of controls per case                                                                                                                                                                                                                                                     |                      |
| Variables            | 7        | Clearly define all outcomes, exposures, predictors, potential confounders, and effect modifiers. Give diagnostic criteria, if applicable                                                                                                                                                                                                                                                                                                                                       |                      |



| Section and Item             | Item No. | Recommendation                                                                                                                                                                                                                                                                                                    | Reported on Page No. |
|------------------------------|----------|-------------------------------------------------------------------------------------------------------------------------------------------------------------------------------------------------------------------------------------------------------------------------------------------------------------------|----------------------|
| Data Sources/<br>Measurement | 8*       | For each variable of interest, give sources of data and details of methods of assessment (measurement). Describe comparability of assessment methods if there is more than one group                                                                                                                              |                      |
| Bias                         | 9        | Describe any efforts to address potential sources of bias                                                                                                                                                                                                                                                         |                      |
| Study Size                   | 10       | Explain how the study size was arrived at                                                                                                                                                                                                                                                                         |                      |
| Quantitative Variables       | 11       | Explain how quantitative variables were handled in the analyses. If applicable, describe which groupings were chosen and why                                                                                                                                                                                      |                      |
| Statistical Methods          | 12       | (a) Describe all statistical methods, including those used to control for confounding                                                                                                                                                                                                                             |                      |
|                              |          | (b) Describe any methods used to examine subgroups and interactions                                                                                                                                                                                                                                               |                      |
|                              |          | (c) Explain how missing data were addressed                                                                                                                                                                                                                                                                       |                      |
|                              |          | (d) <i>Cohort study</i> —If applicable, explain how loss to follow-up was addressed<br><br><i>Case-control study</i> —If applicable, explain how matching of cases and controls was addressed<br><br><i>Cross-sectional study</i> —If applicable, describe analytical methods taking account of sampling strategy |                      |
|                              |          | (e) Describe any sensitivity analyses                                                                                                                                                                                                                                                                             |                      |
| <b>Results</b>               |          |                                                                                                                                                                                                                                                                                                                   |                      |
| Participants                 | 13*      | (a) Report numbers of individuals at each stage of study—eg numbers potentially eligible, examined for eligibility, confirmed eligible, included in the study, completing follow-up, and analysed                                                                                                                 |                      |
|                              |          | (b) Give reasons for non-participation at each stage                                                                                                                                                                                                                                                              |                      |
|                              |          | (c) Consider use of a flow diagram                                                                                                                                                                                                                                                                                |                      |
| Descriptive Data             | 14*      | (a) Give characteristics of study participants (eg demographic, clinical, social) and information on exposures and potential confounders                                                                                                                                                                          |                      |
|                              |          | (b) Indicate number of participants with missing data for each variable of interest                                                                                                                                                                                                                               |                      |
|                              |          | (c) <i>Cohort study</i> —Summarise follow-up time (eg, average and total amount)                                                                                                                                                                                                                                  |                      |
| Outcome Data                 | 15*      | <i>Cohort study</i> —Report numbers of outcome events or summary measures over time                                                                                                                                                                                                                               |                      |
|                              |          | <i>Case-control study</i> —Report numbers in each exposure category, or summary measures of exposure                                                                                                                                                                                                              |                      |
|                              |          | <i>Cross-sectional study</i> —Report numbers of outcome events or summary measures                                                                                                                                                                                                                                |                      |

| Section and Item         | Item No. | Recommendation                                                                                                                                                                                               | Reported on Page No. |
|--------------------------|----------|--------------------------------------------------------------------------------------------------------------------------------------------------------------------------------------------------------------|----------------------|
| Main Results             | 16       | (a) Give unadjusted estimates and, if applicable, confounder-adjusted estimates and their precision (eg, 95% confidence interval). Make clear which confounders were adjusted for and why they were included |                      |
|                          |          | (b) Report category boundaries when continuous variables were categorized                                                                                                                                    |                      |
|                          |          | (c) If relevant, consider translating estimates of relative risk into absolute risk for a meaningful time period                                                                                             |                      |
| Other Analyses           | 17       | Report other analyses done—eg analyses of subgroups and interactions, and sensitivity analyses                                                                                                               |                      |
| <b>Discussion</b>        |          |                                                                                                                                                                                                              |                      |
| Key Results              | 18       | Summarise key results with reference to study objectives                                                                                                                                                     |                      |
| Limitations              | 19       | Discuss limitations of the study, taking into account sources of potential bias or imprecision. Discuss both direction and magnitude of any potential bias                                                   |                      |
| Interpretation           | 20       | Give a cautious overall interpretation of results considering objectives, limitations, multiplicity of analyses, results from similar studies, and other relevant evidence                                   |                      |
| Generalisability         | 21       | Discuss the generalisability (external validity) of the study results                                                                                                                                        |                      |
| <b>Other Information</b> |          |                                                                                                                                                                                                              |                      |
| Funding                  | 22       | Give the source of funding and the role of the funders for the present study and, if applicable, for the original study on which the present article is based                                                |                      |

\*Give information separately for cases and controls in case-control studies and, if applicable, for exposed and unexposed groups in cohort and cross-sectional studies.

**Once you have completed this checklist, please save a copy and upload it as part of your submission. DO NOT include this checklist as part of the main manuscript document. It must be uploaded as a separate file.**

# BMJ Open

## Asthma and Risk of Glioma: A Population-Based Case-Control Study

|                                 |                                                                                                                                                                                                                                                                                                                                                                                                                                                                                                                                                                                                                                                                                                                   |
|---------------------------------|-------------------------------------------------------------------------------------------------------------------------------------------------------------------------------------------------------------------------------------------------------------------------------------------------------------------------------------------------------------------------------------------------------------------------------------------------------------------------------------------------------------------------------------------------------------------------------------------------------------------------------------------------------------------------------------------------------------------|
| Journal:                        | <i>BMJ Open</i>                                                                                                                                                                                                                                                                                                                                                                                                                                                                                                                                                                                                                                                                                                   |
| Manuscript ID                   | bmjopen-2018-025746.R1                                                                                                                                                                                                                                                                                                                                                                                                                                                                                                                                                                                                                                                                                            |
| Article Type:                   | Research                                                                                                                                                                                                                                                                                                                                                                                                                                                                                                                                                                                                                                                                                                          |
| Date Submitted by the Author:   | 23-Jan-2019                                                                                                                                                                                                                                                                                                                                                                                                                                                                                                                                                                                                                                                                                                       |
| Complete List of Authors:       | Kaur, Harsheen; University of New Mexico, Pediatric Neurology<br>Lachance, Daniel; Mayo Clinic, Neurology<br>Ryan, Conor; Mayo Clinic, Child and Adolescent Neurology<br>Sheen, Youn Ho; CHA Gangnam Medical Center, Pediatrics; Mayo Clinic, Pediatric and Adolescent Medicine<br>Seol, Hee Yun; Mayo Clinic, Pediatric and Adolescent Medicine<br>Wi, Chung-Il ; Mayo Clinic Minnesota, Pediatric and Adolescent Medicine<br>Sohn, Sunghwan; Mayo Clinic, Biomedical Statistics and Informatics<br>King, Katherine; Mayo Clinic Minnesota, Biomedical statistics and informatics<br>Ryu, Euijung; Mayo Clinic, Health Science Research<br>Juhn, Young; Mayo Clinic, Community Pediatric and Adolescent Medicine |
| <b>Primary Subject Heading</b>: | Epidemiology                                                                                                                                                                                                                                                                                                                                                                                                                                                                                                                                                                                                                                                                                                      |
| Secondary Subject Heading:      | Immunology (including allergy), Neurology                                                                                                                                                                                                                                                                                                                                                                                                                                                                                                                                                                                                                                                                         |
| Keywords:                       | Asthma < THORACIC MEDICINE, Epidemiology < TROPICAL MEDICINE, Allergy < THORACIC MEDICINE                                                                                                                                                                                                                                                                                                                                                                                                                                                                                                                                                                                                                         |
|                                 |                                                                                                                                                                                                                                                                                                                                                                                                                                                                                                                                                                                                                                                                                                                   |

SCHOLARONE™  
Manuscripts

## Asthma and Risk of Glioma: A Population-Based Case-Control Study

Harsheen Kaur<sup>1,2</sup>,MD, Daniel H. Lachance<sup>3</sup>,MD, Conor S. Ryan<sup>4</sup>,MD, Youn Ho Sheen<sup>1,5</sup>,MD, Hee Yun Seol<sup>1</sup>,MD, Chung-II Wi<sup>1</sup>,MD, Sunghwan Sohn<sup>6</sup>,PhD, Katherine S. King<sup>6</sup>,MS, Euijung Ryu<sup>6</sup>,PhD, Young J. Juhn<sup>7\*</sup> MD, MPH

<sup>1</sup>Department of Pediatric and Adolescent Medicine, Mayo Clinic, Rochester, Minnesota, USA; <sup>2</sup>Department of Pediatric Neurology, University of New Mexico, Albuquerque, New Mexico, USA; <sup>3</sup>Department of Neurology, Mayo Clinic, Rochester, MN, USA; <sup>4</sup>Division of Child and Adolescent Neurology, Mayo Clinic, Rochester, MN, USA, <sup>5</sup>Department of Pediatrics, CHA Gangnam Medical Center, CHA University School of Medicine, Seoul, Korea; <sup>6</sup>Division of Biomedical Statistics and Informatics, Mayo Clinic, Rochester, MN,USA;; <sup>7</sup>Department of Pediatric and Adolescent Medicine/Internal Medicine, Mayo Clinic, Rochester, MN, USA

### \*Correspondence to: Young J. Juhn, MD, MPH

Professor of Pediatrics

Asthma Epidemiology Research Unit

Department of Pediatric and Adolescent Medicine, Mayo Clinic

200 1st Street SW, Rochester, MN 55905

E-mail: [Juhn.young@mayo.edu](mailto:Juhn.young@mayo.edu)

Phone: 507-538-1642

Fax: 507-284-9744

1  
2  
3 **Contributorship statement:** All authors meet the criteria for authorship based on the  
4 following four requirements: (1) substantial contributions to the conception or design of  
5 the work; or the acquisition, analysis, or interpretation of data for the work; (2) drafting  
6 the work or revising it critically for important intellectual content; (3) final approval of the  
7 version to be published; and (4) agreement to be accountable for all aspects of the work  
8 in ensuring that questions related to the accuracy or integrity of any part of the work are  
9 appropriately investigated and resolved. Specifically, Y.J.J. had full access to all of the  
10 data in the study, takes responsibility for the integrity of the data and the accuracy of the  
11 data analysis, and had authority over manuscript preparation and the decision to submit  
12 the manuscript for publication.  
13  
14  
15  
16  
17  
18  
19  
20  
21  
22  
23  
24

25  
26 Study concept and design: C.W., D.L., and Y.J.J.

27  
28 Acquisition, analysis, or interpretation of data: H.K., C.R., Y.S., H.S., C.W., S.S., K.K.,  
29 E.R., D.L., and Y.J.J. Drafting of the manuscript: H.K., C.R., H.S., C.W., E.R., D.L., and  
30 Y.J.J.  
31  
32  
33  
34

35 Critical revision of the manuscript for important intellectual content: all authors.

36  
37 Statistical analysis: C.W., K.K., and E.R.

38  
39 Study supervision: C.W., D.L., and Y.J.J.  
40  
41  
42  
43

44  
45 Competing interest statement: None Declared.  
46  
47  
48  
49  
50  
51  
52  
53  
54  
55  
56  
57  
58  
59  
60

**Abstract (257/300 words)**

**Objectives:** Literature suggests an inconsistent, but largely inverse, association between asthma and risk of glioma, which is primarily due to methodological inconsistency in sampling frame and ascertainment of asthma.

Objective of the study was to clarify the association between asthma and risk of glioma by minimizing methodological biases (eg, recall and detection bias).

**Design:** A population-based case-control study

**Setting:** General population in Olmsted County, Minnesota, US

**Participants:** All eligible biopsy-proven incident glioma cases (1995-2014) and two sets of controls among residents matched to age and sex (1<sup>st</sup> set: community controls without glioma; 2<sup>nd</sup> set: MRI-negative controls from the same community).

**Methods:** The predetermined asthma criteria via medical record review were applied to ascertain asthma status of cases and controls. History of asthma prior to index date was compared between glioma cases and their matched controls using conditional logistic regression models. Propensity score for asthma status was adjusted for multivariate analysis.

**Results:** We enrolled 135 glioma cases (median age at index date: 53 years) and 270 controls. Of the cases, 21 had a history of asthma (16%), compared to 36 of MRI controls (27%) [OR (95%CI): 0.48 (0.26-0.91), p=0.03]. With MRI controls, inverse association between asthma and risk of glioma persisted after adjusting for the propensity score for asthma status, but did not reach statistical significance probably due to the lack of statistical power (OR [95%CI]: 0.48 [0.21-1.09]; p=0.08) Based on

1  
2  
3 comparison of characteristics of controls and cases, community controls seem to be  
4  
5 more susceptible to a detection bias.  
6

7 **Conclusions:** While differential detection might account for the association between  
8  
9 asthma and risk of glioma, asthma may potentially pose a protective effect on risk of  
10  
11 glioma. Our study results need to be replicated by a larger study.  
12  
13  
14

15  
16  
17 Key Words (3-5 words): glioma, asthma, epidemiology, sampling, allergy  
18  
19  
20

21 **Strengths and limitations of this study:**  
22

- 23  
24 1. This is a population-based case-control study performed in a self-contained  
25  
26 community to address selection bias.  
27  
28 2. Predetermined asthma criteria (exposure) and biopsy-proven glioma case  
29  
30 ascertainment (outcome) were used along with two different sets of controls to  
31  
32 assess the impact of detection bias.  
33  
34 3. Laboratory data and lung function testing results not included in the study results.  
35  
36  
37 4. Despite a population-based study, our study includes a small number of glioma  
38  
39 cases which did not allow us to fully address asthma heterogeneity.  
40  
41  
42  
43  
44  
45  
46

47 **Data sharing statement:** No additional data available.  
48  
49  
50

51 **Funding source:** This was supported by NIH-funded R01 grant (R01 HL126667) and  
52  
53 R21 grant (R21AI116839-01). This study was also made possible using the resources  
54  
55  
56  
57  
58  
59  
60

1  
2  
3 of the Rochester Epidemiology Project, which is supported by the National Institute on  
4  
5 Aging of the National Institutes of Health under Award Number R01AG034676. Its  
6  
7 contents are solely the responsibility of the authors and do not necessarily represent the  
8  
9 official view of NIH.  
10  
11  
12  
13  
14  
15  
16  
17  
18  
19  
20  
21  
22  
23  
24  
25  
26  
27  
28  
29  
30  
31  
32  
33  
34  
35  
36  
37  
38  
39  
40  
41  
42  
43  
44  
45  
46  
47  
48  
49  
50  
51  
52  
53  
54  
55  
56  
57  
58  
59  
60

For peer review only



1  
2  
3 **Word count: 3,615 / 3,000 words**  
4

## 5 **INTRODUCTION**

6  
7 Glioma is the most common primary intracranial malignant tumor (1). Approximately,  
8 17,600 new cases of gliomas are diagnosed per year with a 5-year survival rate of 27%  
9  
10 (2). Although treatment options have improved with better understanding of the  
11  
12 molecular biology of these tumors, malignant glioma remains incurable with largely  
13  
14 unknown etiology (3).  
15  
16  
17  
18  
19

20 Many previous case-control studies that assessed the association between *asthma* and  
21  
22 development of glioma suggested inverse associations. However, some  
23  
24 methodological limitations of previous studies might account for some of the  
25  
26 inconsistent results and obscure previously reported inverse associations between  
27  
28 asthma and the risk of glioma. In addressing the methodological limitations of previous  
29  
30 studies, we had a few specific concerns: 1) *self-reported asthma ascertainment* as  
31  
32 exposure instead of predetermined criteria for asthma based on medical record review  
33  
34 (eg, recall bias), and 2) *detection bias* stemming from differential detection of exposure  
35  
36 as a result of differential health care access between glioma cases and controls. For  
37  
38 example, almost a quarter of caregivers whose children were admitted to hospital with a  
39  
40 diagnosis of asthma reported that their children did not have asthma.(4) Similarly, 7.5%  
41  
42 of high-schoolers who had recurrent asthma symptoms were not diagnosed with  
43  
44 asthma, (5) and this is true for adults as well.(6) In previous studies assessing  
45  
46 association between asthma and glioma, almost all studies were based on self-reported  
47  
48 asthma status, which can be also influenced by the rapidly debilitating nature of glioma  
49  
50 causing cognitive and memory impairment potentially leading to misclassification of  
51  
52  
53  
54  
55  
56  
57  
58  
59  
60

1  
2  
3 asthma. eTable 1 summarizes literature regarding asthma and risk of glioma as well as  
4 their study designs. In terms of detection bias, individuals with asthma might be more  
5 likely to seek medical care and evaluation for their current or previous respiratory  
6 symptoms raising neurological symptoms related to glioma as outcome and undergoing  
7 an imaging study.  
8  
9

10  
11  
12 To address these methodological limitations in assessing the relationship between  
13 asthma and risk of glioma, we designed this study as a population-based case-control  
14 study that enrolled all eligible biopsy-proven incident glioma cases (both adult and  
15 pediatric cases) and two sets of matched-controls from the community population, i.e.,  
16 (1) community controls who do not have history of glioma, and (2) MRI-controls with  
17 negative test results. We postulate that MRI-controls are more suitable (than community  
18 controls) as they are likely to be more similar to cases with regard to the likelihood of  
19 detection of outcome event due to similar health care access to glioma cases (ie,  
20 minimizing detection bias) as suggested in the literature.(7-9) This study design allows  
21 examining a potential detection bias. In addition, we utilized predetermined asthma  
22 criteria (delineated in Table 1) and performed a comprehensive medical record review  
23 to objectively ascertain the asthma status. Our study specifically focused on the  
24 association between asthma, not overall allergies, and the risk of glioma and despite the  
25 small sample size, we explored to assess the relationship between heterogeneity of  
26 asthma and the risk of glioma.  
27  
28  
29  
30  
31  
32  
33  
34  
35  
36  
37  
38  
39  
40  
41  
42  
43  
44  
45  
46  
47  
48  
49  
50  
51  
52

## 53 **METHODS:**

### 54 Study Setting

1  
2  
3 Olmsted County, southeastern Minnesota is an excellent setting to conduct a  
4 population-based epidemiologic study because medical care is virtually self-contained  
5 within the community. When patients register with any health care providers in the  
6 community, they or their parents/legal guardian are asked to grant authorization of use  
7 of their medical records for research. Authorization is granted by over 95% of all  
8 individuals. Comprehensive medical records research at Olmsted County is made  
9 possible through the Rochester Epidemiology Project (REP), which has been  
10 continuously funded by NIH and maintained since 1966.(10) The REP database  
11 consists of all medical records from two major medical centers (Mayo Clinic Rochester  
12 and Olmsted Medical Center) and their affiliated hospitals. Only those individuals with  
13 current research authorization were included in this study. The population  
14 demographics of Olmsted County and of those included the REP database have been  
15 previously described.(10)  
16  
17  
18  
19  
20  
21  
22  
23  
24  
25  
26  
27  
28  
29  
30  
31  
32  
33  
34

### 35 Study Design and Study Subjects:

36  
37 A retrospective population-based case-control design was employed. Patients  
38 diagnosed with glioma (cases) during 1995-2014 and their two matched controls (see  
39 Case Ascertainment and Selection of Controls) were identified from the REP database  
40 representing Olmsted County, MN residents. Asthma status prior to index date of cases  
41 and their matched controls was ascertained by predetermined asthma criteria and its  
42 frequency was compared between cases and controls (each control group and both  
43 control groups separately). The Olmsted Medical Center and Mayo Clinic Institutional  
44 Review Boards approved this study.  
45  
46  
47  
48  
49  
50  
51  
52  
53  
54  
55  
56  
57  
58  
59  
60

### Patient and public involvement

No patients or the public were involved in the study protocol design, the specific aims or the research questions, and the plans for the design or implementation of the current study. No patients or the public were involved in the interpretation of the results of the study or preparation of the manuscript. There are no plans to disseminate the results of the research to study participants.

### Case Ascertainment

All Olmsted County residents who developed glioma during the study period of January 1<sup>st</sup>, 1995, to December 31<sup>st</sup>, 2014, were identified from the Mayo Clinic Tumor Registry and the REP using medical index search codes. The medical index search codes used for this study include HICDA (Mayo's modified version of the Hospital Adaptation of the Internal Classification of Diseases, used at Mayo since 1975) and ICD-9 codes. Each preliminary case was reviewed to ascertain cases that met the enrollment criteria, including 1) Olmsted County residency at the index date and one year prior to index date, with 2) research authorization, and 3) pathology confirmed glioma cases [e.g., astrocytoma, oligodendroglioma, gliomatosis cerebri, mixed gliomas (oligoastrocytoma), and glioblastoma] of brain and spinal cord. The index date was defined as the date of glioma diagnosis by pathology reporting. World Health Organization (WHO) classification of primary brain tumors according to histology and grade was applied (i.e., Grade I, II-III, Grade IV).(11)

1  
2  
3 The exclusion criteria included: 1) non-Olmsted County residents at or one year  
4 prior to index date, 2) individuals without research authorization, 3) insufficient medical  
5 records for determining case and exposure status, 4) non-glioma tumor types (e.g.,  
6 recurrent glioma, metastatic brain tumor, ependymoma, and non-glial brain tumor [e.g.,  
7 meningioma]), 5) glioma-related hereditary syndrome (e.g., tuberous sclerosis,  
8 neurofibromatosis types 1 and 2), 6) absence of a tissue diagnosis, and 7) clinical  
9 conditions making asthma ascertainment difficult (see Table 1).  
10  
11  
12  
13  
14  
15  
16  
17  
18  
19  
20  
21

### 22 Selection of Controls

23  
24 Two controls per case, matched based upon birth year, sex, and registration  
25 year, to ensure similar exposure to health care between cases and controls, were  
26 identified in the REP database to assess the potential detection bias which might have  
27 attenuated or obscured the previously reported inverse association between asthma  
28 and risk of glioma, especially an inverse association. The first cohort of controls  
29 included subjects selected from the population in Olmsted County who did not have any  
30 history of glioma by HICDA and ICD-9 codes for initial screening confirmed by medical  
31 record review (“community control”). The second controls were subjects who had  
32 undergone brain or neck imaging, identified by CPT codes completed within one year of  
33 their corresponding case diagnosis, who had normal findings (“MRI control”). The index  
34 date for control was same as the one of their corresponding case. Controls were held to  
35 the same enrollment and exclusion criteria as cases. Reasons for MRI imaging among  
36 the MRI controls were reviewed and reported (eTable 2).  
37  
38  
39  
40  
41  
42  
43  
44  
45  
46  
47  
48  
49  
50  
51  
52  
53

### 54 Asthma Ascertainment

1  
2  
3 We determined asthma status prior to the index date for both cases and controls  
4 according to predetermined asthma criteria (PAC) outlined in Table 1. Both definite and  
5 probable asthma statuses were considered as asthma as most probable asthma  
6 became definite asthma over time(12). This asthma criteria was originally developed by  
7 Drs. John Yunginger and Charles Reed(12) and has shown excellent construct validity  
8 and reliability (0.72-0.92) of the criteria (12-15). The onset date of asthma (asthma  
9 inception date) by PAC, was defined as the earliest constellation of symptoms found in  
10 the medical record that met the PAC, which provides a clearer temporal relationship  
11 between onset of asthma and the risk of glioma.  
12

13  
14 Active (or current) asthma was defined as the presence of any asthma-related events,  
15 including asthma symptoms (e.g., wheezing, night cough, dyspnea), use of asthma  
16 medications (e.g. short-acting beta agonists, inhaled corticosteroids, leukotriene  
17 inhibitors), and/or outpatient, inpatient or emergency department (ED) visits for asthma  
18 within 12 months of the index date. Poorly controlled asthma was defined as the  
19 presence of any asthma symptoms, use of systemic corticosteroid for asthma  
20 symptoms, or unscheduled visits for asthma, including ED or hospitalization for asthma,  
21 within six months prior to index date (16).  
22

23  
24 For those patients with an electronic medical record (EMR) at Mayo Clinic  
25 available since 1997, we used a natural language processing (NLP) algorithm to  
26 determine PAC (NLP-PAC; automatic chart review for EMR by computer). This was  
27 developed and validated for automatic chart review for determining PAC by computer  
28 and the details have been recently reported (17). Briefly, validation performance of NLP-  
29 PAC was promising with 97%, 95%, 90%, and 98% for sensitivity, specificity, positive  
30  
31  
32  
33  
34  
35  
36  
37  
38  
39  
40  
41  
42  
43  
44  
45  
46  
47  
48  
49  
50  
51  
52  
53  
54  
55  
56  
57  
58  
59  
60

1  
2  
3 predictive value, and negative predictive value of NLP algorithm against manual chart  
4 review. This NLP-PAC algorithm has been externally validated by assessing validity in a  
5 different study setting (Sioux Falls, South Dakota) (18)  
6  
7  
8  
9  
10

### 11 Other variables

12 Demographics including sex, age, race and clinical characteristics including family  
13 history of asthma, and a physician diagnosis of other atopic conditions (eczema and  
14 allergic rhinitis) were reported. A family history of asthma, smoking status within 3  
15 months prior to index date (second-hand smoking included for pediatric population),  
16 pneumococcal and seasonal influenza vaccine status as a surrogate marker for access  
17 to health care service, co-morbid conditions (history of epilepsy, stroke or transient  
18 ischemic attack (TIA), rheumatoid arthritis, lupus erythematosus, multiple sclerosis, and  
19 diabetes) were collected by abstractors. Factors related to socioeconomic status (SES)  
20 were measured using an individual-level housing-based socioeconomic status measure  
21 we developed and validated, called HOUSES. (19, 20) This data was formulated as  
22 standardized z-scores based on the address information at index date using real  
23 property data (i.e. value, size, number of bedrooms and bathrooms) after  
24 geocoding.(19) Higher HOUSES values equate to higher socioeconomic status.  
25  
26  
27  
28  
29  
30  
31  
32  
33  
34  
35  
36  
37  
38  
39  
40  
41  
42  
43  
44  
45  
46

### 47 Statistical Analysis

48 We summarized the characteristics of cases and two sets of controls using descriptive  
49 statistics. We performed conditional logistic regression to assess the association of  
50 asthma status and its other characteristics with risk of glioma. Odds ratios (OR) and  
51  
52  
53  
54  
55  
56  
57  
58  
59  
60

1  
2  
3 their corresponding 95% confidence intervals (95% CIs) were presented. To minimize  
4 the impact of confounders for the association between asthma and risk of glioma, the  
5 propensity scores for asthma status were first calculated and then adjusted in the  
6 analysis. A gradient boosting machine (GBM) approach allowing interaction was used  
7 for calculating the propensity scores using sociodemographic variables (listed in Table  
8 2; race, education, HOUSES, seasonal flu vaccination, PPSV23 vaccination, and  
9 smoking exposure).(21) We also looked at differences between subgroups (i.e.,  
10 stratified by tumor grade) although no formal comparisons were made because of the  
11 small sample sizes. All analyses were performed using SAS statistical software  
12 package (Ver 9.4; SAS Institute, Inc., Cary, NC) and R package (R Core Team (2017).  
13 R: A language and environment for statistical computing. R Foundation for Statistical  
14 Computing, Vienna, Austria).

## 34 RESULTS

### 36 Study subjects

37 A total of 567 patients were found in the Mayo Clinic Tumor Registry or the Rochester  
38 Epidemiology Project (REP) with a diagnosis code for glioma. Of these, 432 were  
39 excluded for not meeting the inclusion criteria or meeting the exclusion criteria, with 135  
40 as our final cases including 19 (14%) pediatric cases (<18 years) (eFigure1).

41 The sociodemographic characteristics are summarized in Table 2. When we compared  
42 each control set (i.e., community controls and MRI controls) with cases in terms of  
43 socioeconomic status (HOUSES) and access to health care (seasonal flu vaccine and  
44 PPSV23), we found MRI controls were more similar to cases than population controls.



1  
2  
3 This suggests that MRI controls may be more representative of the source population to  
4 compare against the glioma cases in this study.  
5  
6  
7  
8  
9

### 10 Comparison of prevalence of asthma between glioma cases and controls

11  
12 Twenty one (16%) of the 135 cases had asthma, whereas 36 (27%) of the 135 MRI  
13 controls and 17 (13%) of the 135 community controls had asthma (OR [95%CI]: 0.48  
14 [0.26-0.91]; p=0.03 for MRI controls and OR [95%CI]: 1.28 [0.64-2.59]; p=0.48 for  
15 community controls; see Table 3). We assessed the association of asthma status with  
16 cases (vs. MRI controls) after adjusting for the propensity score for asthma status, and  
17 found asthma remained to be protective of glioma, but did not reach statistical  
18 significance probably due to the lack of statistical power (OR [95%CI]: 0.48 [0.21-1.09];  
19 p=0.08) (Table 4).  
20  
21  
22  
23  
24  
25  
26  
27  
28  
29

30  
31 When we stratified cases by WHO grade (I [n=19], II-III [n=40], and IV [n=76]), glioma  
32 cases were less likely to have a history of asthma compared to MRI controls in all  
33 grades (16% [cases] vs. 47% (0.21, 0.05-0.96) [MRI controls], 18% vs. 30% (0.50, 0.17-  
34 1.43), 15% vs. 20% (0.69, 0.29-1.62) for Grade I, II-III, and IV, respectively). Active  
35 asthma (OR [95% CI]: 0.40 [0.17-0.93]) was associated with a stronger inverse  
36 association with glioma risk compared to inactive asthma (0.58 [0.26-1.28]) when using  
37 non-asthmatic group as the reference group. Poorly controlled asthma (0.1 [0.02-1.1])  
38 showed similar effect, but did not reach statistical significance. As an association  
39 between asthma and glioma has been reported to change directions near the detection  
40 of glioma (22), we assessed the association of asthma and risk of glioma after  
41 excluding those with <2 years of latency in our study, but no difference was found. In  
42  
43  
44  
45  
46  
47  
48  
49  
50  
51  
52  
53  
54  
55  
56  
57  
58  
59  
60

1  
2  
3 pediatric subjects, there was no difference in the proportions of asthma between cases  
4  
5 and both control groups (ie, 14% in all subgroups [cases, MRI controls, and community  
6  
7 controls]).  
8  
9

10  
11  
12 *Comparison of prevalence of other comorbidities and smoking status between glioma*  
13  
14 *cases and controls*  
15

16  
17 While allergic rhinitis, eczema, and family history of asthma for cases with comparison  
18  
19 with MRI controls showed toward more inverse association with glioma, they all failed to  
20  
21 reach statistical significance in part due to small sample size (Table 3). Stroke or TIA  
22  
23 was significantly associated with risk of glioma in comparison with either control group,  
24  
25 but diabetes was not. Other comorbidities assessed such as epilepsy, rheumatoid  
26  
27 arthritis, systemic lupus erythematosus, and multiple sclerosis were very rare in our  
28  
29 cohort and were not analyzed. Glioma cases were less likely to have a history of  
30  
31 smoking exposure, especially compared to MRI controls (OR [95% CI]: 0.5 [0.3-0.9]).  
32  
33  
34  
35  
36  
37

38 **DISCUSSION**  
39

40 In this study, using two different control sets, while asthma tends to be inversely  
41  
42 associated with the risk of glioma based on MRI controls, such association was not  
43  
44 supported in community controls. As MRI controls were more similar to cases (than  
45  
46 community controls), our study results may uphold previous study results supporting an  
47  
48 inverse association between asthma and risk of glioma. At the same time, these  
49  
50 differential results depending on controls account for inconsistent results and their  
51  
52 source (selection bias).  
53  
54  
55  
56  
57  
58  
59  
60

1  
2  
3  
4  
5  
6 Patients with asthma may seek health care more often than those without asthma,  
7  
8 resulting in an increased chance of detecting glioma (and other health outcomes)  
9  
10 (detection bias)(23). If detection bias occurred in studying an association between  
11  
12 asthma and the risk of glioma, one would expect an increased detection of asthma  
13  
14 among MRI controls (e.g., a marker for care seeking) leading to a null association (ie,  
15  
16 obscuring an inverse association) and a lower detection of asthma among community  
17  
18 controls resulting in a positive association between asthma and risk of glioma. However,  
19  
20 our study results were contrary to this anticipation (i.e., an inverse association between  
21  
22 asthma and the risk of glioma using MRI controls and no association in community  
23  
24 controls), and thus, MRI controls might negate potential detection bias. In addition,  
25  
26 while our previous study from the same study setting showed non-differential access to  
27  
28 health care between asthmatics and non-asthmatics(24), as MRI controls are more  
29  
30 similar to glioma cases in terms of clinical and socioeconomic variables, we believe MRI  
31  
32 controls may be more suitable and representative for a source population from who  
33  
34 glioma cases were drawn (eg, similar education, HOUSES, and rate of seasonal flu  
35  
36 vaccine). One may be concerned about indications for MRI among MRI controls in  
37  
38 interpretation of the study results. We assessed (eTable 2) whether indications for MRI  
39  
40 among MRI controls are associated with asthma, leading to higher prevalence of  
41  
42 asthma among MRI controls than among cases, resulting in an inverse association.  
43  
44 However, prevalence of common indications for MRI such as headache (migraine),  
45  
46 stroke, dementia, and seizure in MRI controls were overall higher than or similar to  
47  
48 cases, except migraine. This suggests MRI controls might be less biased controls (than  
49  
50  
51  
52  
53  
54  
55  
56  
57  
58  
59  
60

1  
2  
3 community controls) which are likely to minimize a detection bias obscuring an inverse  
4 association between asthma and the risk of glioma.  
5  
6  
7  
8  
9

10 To minimize misclassification bias for asthma status from self-report or ICD codes, we  
11 utilized an objective method for asthma ascertainment by applying predetermined  
12 asthma criteria (PAC) through comprehensive medical record review. Apart from the  
13 association between asthma status and risk of glioma, in the analysis using MRI  
14 controls, active asthma showed a more protective effect than inactive asthma and  
15 similarly poorly controlled asthma posed a more protective effect than not-poorly  
16 controlled asthma, although it did not reach statistical significance. Therefore, overall,  
17 our results on an inverse association between asthma and the risk of glioma based on  
18 MRI controls might uphold prior observations supporting such inverse associations.  
19  
20  
21  
22  
23  
24  
25  
26  
27  
28  
29  
30  
31  
32

33 The relationship between asthma and risk of malignancy in general varies depending on  
34 the type of malignancy. For example, asthma has been shown to increase the risk for  
35 lung cancer while inverse association of asthma with multiple tumors has been reported  
36 including pancreatic or stomach cancer, acute lymphoblastic leukemia, gliomas, non-  
37 Hodgkin's lymphoma, and even colorectal cancer(25, 26). Hyperactive immune systems  
38 in patients with allergic disorders could cause a lower incidence of cancers(27). In fact,  
39 presence of any allergic disorder (eczema, allergic rhinitis or asthma) in studies with  
40 twins or similar genetic and environmental factors have demonstrated lower association  
41 with gliomas(28). However, in our study, atopic conditions other than asthma were not  
42 associated with the risk of glioma presumably due to small sample size and  
43  
44  
45  
46  
47  
48  
49  
50  
51  
52  
53  
54  
55  
56  
57  
58  
59  
60

1  
2  
3 methodological limitations (eg, undetected allergic rhinitis which might be identified by  
4 self-report). Along these lines, a family history of asthma as a marker for shared  
5 genetics or environment (29) was not associated with the risk of glioma in our study  
6 which is consistent with the literature (30, 31).  
7  
8  
9  
10  
11  
12

13  
14 Temporality between asthma (by self-report) and glioma previous studies reported could  
15 be inconsistent in terms of the total duration of asthma and age at asthma onset. (32-  
16 34) For example, Wigertz et al reported inverse association for both current and past  
17 asthma related with glioma while the reduced risk of glioma related to other allergic  
18 conditions such as eczema, hay fever, and overall allergy were confined to current  
19 rather than past conditions. Our study results suggest that active (current) asthma,  
20 especially poorly controlled asthma posed the strongest protective effect, compared to  
21 non-asthmatics and inactive (past) asthma by our predetermined criteria. As these  
22 findings are based on predetermined criteria for asthma status and asthma control  
23 status (not relying on self-report and unclear temporality), the results have greater  
24 reproducibility and provide a better insight into the relationship between asthma status,  
25 control status, and the risk of glioma. While no association between pediatric glioma  
26 cases and asthma was found, this needs to be replicated given small sample size of  
27 pediatric cases.  
28  
29  
30  
31  
32  
33  
34  
35  
36  
37  
38  
39  
40  
41  
42  
43  
44  
45  
46  
47  
48

49 The mechanisms underlying the potential inverse association is unknown. It is  
50 important to determine which one (asthma vs. its associated risk factors [i.e.,  
51 confounders]) is responsible for this observed potential inverse association. As our  
52  
53  
54  
55  
56  
57  
58  
59  
60

1  
2  
3 study is epidemiological and focused on clarification of inconsistent results of the  
4  
5 literature, this study question needs to be addressed in the future. Prior studies suggest  
6  
7 that antihistamines have been implicated to worsen glioma burden in patients with  
8  
9 allergies with inconsistent result (35-38) while biological plausibility is yet to be  
10  
11 identified. Also, literature suggests that immunoglobulin E (IgE) plays a role in reducing  
12  
13 the risk of cancers and use of IgE monoclonal antibodies for the passive  
14  
15 immunotherapy in murine models has been found to kill tumor cells in multiple previous  
16  
17 studies via antibody dependent cellular toxicity.(39),(40) Along these lines, cytokines  
18  
19 associated with Th2-immune responses have shown anti-tumor activity(41). For  
20  
21 example, IL-5 which is a cytokine produced by lymphoid cells has been found to recruit  
22  
23 eosinophils and create a microenvironment that prevents tumor formation in the lung.  
24  
25 However, whether this type of anti-tumor activity is applicable to glioma needs to be  
26  
27 studied. Though the underlying mechanisms remain poorly understood, our work  
28  
29 clarified the inconsistency of the literature on the association between asthma and risk  
30  
31 of glioma and provides an insight into a potential inverse association between asthma  
32  
33 and risk of glioma.  
34  
35  
36  
37  
38  
39  
40  
41

42 Our study has some inherent limitations as a retrospective study. We did not include  
43  
44 laboratory or lung function data to measure Th2 immune responses or other  
45  
46 inflammatory responses, which might help us to discern the study results. The power of  
47  
48 our study was limited due to a small number of glioma cases even if our study included  
49  
50 all eligible population-based cases. These study results need to be replicated with a  
51  
52 larger number of glioma cases in future studies. As our study setting mostly consists of  
53  
54  
55  
56  
57  
58  
59  
60

1  
2  
3 Caucasian patients, generalizability of our study results to other settings or ethnic  
4 groups needs to be cautious. Our study also has important strengths. The study setting  
5 has unique advantages, including a self-contained health care environment and a  
6 medical record linkage system. This is also a population-based study design, which  
7 minimizes a selection bias. In addition, as we only included incident cases of glioma  
8 and determined index date of asthma as well, we were able to assess temporality on  
9 the relationship between asthma and risk of glioma. We used two sets of controls to  
10 mitigate or assess detection bias as described above. In addition, ascertainment of  
11 asthma status by using the PAC was performed independent of asthma status by a  
12 physician diagnosis of asthma, which minimized an observational bias.  
13  
14  
15  
16  
17  
18  
19  
20  
21  
22  
23  
24  
25  
26  
27

## 28 **Conclusion**

29  
30 Our study results suggest that asthma may pose a protective effect on the risk of  
31 developing glioma but the results need to be replicated in a larger study. In addition,  
32 our study results clarify the rationale for the inconsistent results on the relationship  
33 between asthma and risk of glioma.  
34  
35  
36  
37  
38  
39  
40  
41

## 42 **ACKNOWLEDGEMENTS**

43  
44 We thank Mrs. Kelly Okeson for her administrative assistance.  
45  
46  
47  
48  
49  
50  
51  
52  
53  
54  
55  
56  
57  
58  
59  
60

## References:

1. Ostrom QT, Gittleman H, Stetson L, Virk SM, Barnholtz-Sloan JS. Epidemiology of gliomas. *Cancer Treat Res*. 2015;163:1-14.
2. Porter KR, McCarthy BJ, Freels S, Kim Y, Davis FG. Prevalence estimates for primary brain tumors in the United States by age, gender, behavior, and histology. *Neuro Oncol*. 2010;12(6):520-7.
3. Baker GJ, Yadav VN, Motsch S, Koschmann C, Calinescu AA, Mineharu Y, et al. Mechanisms of glioma formation: iterative perivascular glioma growth and invasion leads to tumor progression, VEGF-independent vascularization, and resistance to antiangiogenic therapy. *Neoplasia*. 2014;16(7):543-61.
4. Miller JE, Gaboda D, Davis D. Early childhood chronic illness: comparability of maternal reports and medical records. *Vital Health Stat 2*. 2001(131):1-10.
5. Ownby DR, Tingen MS, Havstad S, Waller JL, Johnson CC, Joseph CLM. Comparison of asthma prevalence among African American teenage youth attending public high schools in rural Georgia and urban Detroit. *J Allergy Clin Immunol*. 2015;136(3):595-+.
6. Talay F, Kurt B, Tug T, Kurt OK, Goksugur N, Yasar Z. The prevalence of asthma and allergic diseases among adults 30-49 years of age in Bolu, Western Black Sea Region of Turkey. *Clin Ter*. 2014;165(1):e59-63.
7. Horwitz RI, Feinstein AR. *Alternative Analytic Methods for Case-Control Studies of Estrogens and Endometrial Cancer*. *New England Journal of Medicine*. 1978;299(20):1089-94.
8. Hulka BS, Grimson RC, Greenberg BG, Kaufman DG, Fowler WC, Jr., Hogue CJ, et al. "Alternative" controls in a case-control study of endometrial cancer and exogenous estrogen. *American Journal of Epidemiology*. 1980;112(3):376-87.
9. Kelsey J, Whittemore A, Evans A, Thompson W. *Methods in Observational Epidemiology*. New York and Oxford: Oxford University Press; 1996. 38 p.
10. Rocca WA, Yawn BP, St Sauver JL, Grossardt BR, Melton LJ, 3rd. History of the Rochester Epidemiology Project: half a century of medical records linkage in a US population. *Mayo Clin Proc*. 2012;87(12):1202-13.
11. Louis DN, Perry A, Reifenberger G, von Deimling A, Figarella-Branger D, Cavenee WK, et al. The 2016 World Health Organization Classification of Tumors of the Central Nervous System: a summary. *Acta Neuropathol*. 2016;131(6):803-20.
12. Yunginger J, Reed, CE, O'Connell, EJ, Melton, J, O'Fallon, WM, Silverstein, MD. A Community-based Study of the Epidemiology of Asthma: Incidence Rates, 1964-1983. *Am Rev Respir Dis*. 1992;146:888-94.
13. Juhn YJ, Kita H, Yawn BP, Boyce TG, Yoo KH, McGree ME, et al. Increased risk of serious pneumococcal disease in patients with asthma. *J Allergy Clin Immunol*. 2008;122(4):719-23.
14. Kwon HJ, Bang DW, Kim EN, Wi CI, Yawn BP, Wollan PC, et al. Asthma as a risk factor for zoster in adults: A population-based case-control study. *J Allergy Clin Immunol*. 2016;137(5):1406-12.
15. Kim BS, Mehra S, Yawn B, Grose C, Tarrell R, Lahr B, et al. Increased risk of herpes zoster in children with asthma: a population-based case-control study. *J Pediatr*. 2013;163(3):816-21.
16. Reddel HK, Taylor DR, Bateman ED, Boulet LP, Boushey HA, Busse WW, et al. An official American Thoracic Society/European Respiratory Society statement: asthma control and exacerbations: standardizing endpoints for clinical asthma trials and clinical practice. *Am J Respir Crit Care Med*. 2009;180(1):59-99.
17. Wi CI, Sohn S, Rolfes MC, Seabright A, Ryu E, Voge G, et al. Application of a Natural Language Processing Algorithm to Asthma Ascertainment. An Automated Chart Review. *Am J Respir Crit Care Med*. 2017;196(4):430-7.



18. Sohn S, Wi CI, Juhn YJ, Liu H. Analysis of Clinical Variations in Asthma Care Documented in Electronic Health Records Between Staff and Resident Physicians. *Stud Health Technol Inform*. 2017;245:1170-4.
19. Juhn YJ, Beebe TJ, Finnie DM, Sloan J, Wheeler PH, Yawn B, et al. Development and initial testing of a new socioeconomic status measure based on housing data. *Journal of urban health : bulletin of the New York Academy of Medicine*. 2011;88(5):933-44.
20. Wi CI, St Sauver JL, Jacobson DJ, Pendegraft RS, Lahr BD, Ryu E, et al. Ethnicity, Socioeconomic Status, and Health Disparities in a Mixed Rural-Urban US Community-Olmsted County, Minnesota. *Mayo Clin Proc*. 2016;91(5):612-22.
21. Westreich D, Lessler J, Funk MJ. Propensity score estimation: neural networks, support vector machines, decision trees (CART), and meta-classifiers as alternatives to logistic regression. *J Clin Epidemiol*. 2010;63(8):826-33.
22. Cahoon EK, Inskip PD, Gridley G, Brenner AV. Immune-related conditions and subsequent risk of brain cancer in a cohort of 4.5 million male US veterans. *Br J Cancer*. 2014;110(7):1825-33.
23. Horwitz RI, Feinstein AR, Horwitz SM, Robboy SJ. Necropsy diagnosis of endometrial cancer and detection-bias in case/control studies. *Lancet*. 1981;2(8237):66-8.
24. Juhn YJ, Johnson SK, Hashikawa AH, Voigt RG, Campeau LJ, Yawn BP, et al. The potential biases in studying the relationship between asthma and microbial infection. *J Asthma*. 2007;44(10):827-32.
25. Cui Y, Hill AW. Atopy and Specific Cancer Sites: a Review of Epidemiological Studies. *Clin Rev Allergy Immunol*. 2016;51(3):338-52.
26. El-Zein M, Parent ME, Kâ K, Siemiatycki J, St-Pierre Y, Rousseau MC. History of asthma or eczema and cancer risk among men: a population-based case-control study in Montreal, Quebec, Canada. *Ann Allergy Asthma Immunol*. 2010;104(5):378-84.
27. Dunn GP, Bruce AT, Ikeda H, Old LJ, Schreiber RD. Cancer immunoediting: from immunosurveillance to tumor escape. *Nat Immunol*. 2002;3(11):991-8.
28. Il'yasova D, McCarthy B, Marcello J, Schildkraut JM, Moorman PG, Krishnamachari B, et al. Association between glioma and history of allergies, asthma, and eczema: a case-control study with three groups of controls. *Cancer Epidemiol Biomarkers Prev*. 2009;18(4):1232-8.
29. Cárdenas-Roldán J, Rojas-Villarraga A, Anaya JM. How do autoimmune diseases cluster in families? A systematic review and meta-analysis. *BMC Med*. 2013;11:73.
30. Schoemaker MJ, Swerdlow AJ, Hepworth SJ, McKinney PA, van Tongeren M, Muir KR. History of allergies and risk of glioma in adults. *Int J Cancer*. 2006;119(9):2165-72.
31. Roncarolo F, Infante-Rivard C. Asthma and risk of brain cancer in children. *Cancer Causes Control*. 2012;23(4):617-23.
32. Turner MC, Krewski D, Armstrong BK, Chetrit A, Giles GG, Hours M, et al. Allergy and brain tumors in the INTERPHONE study: pooled results from Australia, Canada, France, Israel, and New Zealand. *Cancer Causes Control*. 2013;24(5):949-60.
33. Wigertz A, Lonn S, Schwartzbaum J, Hall P, Auvinen A, Christensen HC, et al. Allergic conditions and brain tumor risk. *American journal of epidemiology*. 2007;166(8):941-50.
34. Pouchieu C, Raherison C, Piel C, Migault L, Carles C, Fabbro-Perray P, et al. Allergic conditions and risk of glioma and meningioma in the CERENAT case-control study. *J Neurooncol*. 2018;138(2):271-81.
35. Amirian ES, Marquez-Do D, Bondy ML, Scheurer ME. Antihistamine use and immunoglobulin E levels in glioma risk and prognosis. *Cancer Epidemiol*. 2013;37(6):908-12.
36. Amirian E, Liu Y, Scheurer ME, El-Zein R, Gilbert MR, Bondy ML. Genetic variants in inflammation pathway genes and asthma in glioma susceptibility. *Neuro Oncol*. 2010;12(5):444-52.
37. Scheurer ME, Amirian ES, Davlin SL, Rice T, Wrensch M, Bondy ML. Effects of antihistamine and anti-inflammatory medication use on risk of specific glioma histologies. *Int J Cancer*. 2011;129(9):2290-6.

- 1  
2  
3 38. McCarthy BJ, Rankin K, Il'yasova D, Erdal S, Vick N, Ali-Osman F, et al. Assessment of type of  
4 allergy and antihistamine use in the development of glioma. *Cancer Epidemiol Biomarkers Prev.*  
5 2011;20(2):370-8.  
6  
7 39. Jensen-Jarolim E, Achatz G, Turner MC, Karagiannis S, Legrand F, Capron M, et al.  
8 *AllergoOncology: the role of IgE-mediated allergy in cancer. Allergy.* 2008;63(10):1255-66.  
9 40. Singer J, Jensen-Jarolim E. IgE-based Immunotherapy of Cancer -A Comparative Oncology  
10 Approach. *J Carcinog Mutagen.* 2014;5(3):1000176.  
11 41. Ikutani M, Yanagibashi T, Ogasawara M, Tsuneyama K, Yamamoto S, Hattori Y, et al.  
12 Identification of innate IL-5-producing cells and their role in lung eosinophil regulation and antitumor  
13 immunity. *J Immunol.* 2012;188(2):703-13.  
14  
15  
16  
17  
18  
19  
20  
21  
22  
23  
24  
25  
26  
27  
28  
29  
30  
31  
32  
33  
34  
35  
36  
37  
38  
39  
40  
41  
42  
43  
44  
45  
46  
47  
48  
49  
50  
51  
52  
53  
54  
55  
56  
57  
58  
59  
60

## Table 1. Predetermined Asthma Criteria

Patients were considered to have *definite* asthma if a physician had made a diagnosis of asthma and/or if each of the following three conditions were present, and they were considered to have *probable* asthma if only the first two conditions were present:

1. History of cough with wheezing, and/or dyspnea, OR history of cough and/or dyspnea plus wheezing on examination,
2. Substantial variability in symptoms from time to time or periods of weeks or more when symptoms were absent, and
3. Two or more of the following:
  - Sleep disturbance by nocturnal cough and wheeze
  - Nonsmoker (14 years or older)
  - Nasal polyps
  - Blood eosinophilia higher than 300/uL
  - Positive wheal and flare skin tests OR elevated serum IgE
  - History of hay fever or infantile eczema OR cough, dyspnea, and wheezing regularly on exposure to an antigen
  - Pulmonary function tests showing one FEV<sub>1</sub> or FVC less than 70% predicted and another with at least 20% improvement to an FEV<sub>1</sub> of higher than 70% predicted OR methacholine challenge test showing 20% or greater decrease in FEV<sub>1</sub>
  - Favorable clinical response to bronchodilator

Patients were excluded from the study if any of these conditions were present:

- Pulmonary function tests that showed FEV<sub>1</sub> to be consistently below 50% predicted or diminished diffusion capacity
- Tracheobronchial foreign body at or about the incidence date
- Hypogammaglobulinemia (IgG less than 2.0 mg/mL) or other immunodeficiency disorder
- Wheezing occurring only in response to anesthesia or medications

The following diseases excluded the patient from study if they occurred before the incidence date:

- Bullous emphysema or pulmonary fibrosis on chest radiograph
  - PiZZ alpha<sub>1</sub>-antitrypsin
  - Cystic fibrosis
  - Other major chest disease such as juvenile kyphoscoliosis or bronchiectasis
- FVC forced vital capacity; FEV<sub>1</sub>, forced expiratory volume in 1 sec.

**Table 2. Sociodemographic characteristics of study subjects and their associated odds ratios of glioma by different set of controls (conditional logistic regression matching age and sex)**

|                                    | Cases<br>(n=135)    | MRI controls<br>(n=135) | OR (95%CI) for<br>MRI controls | P<br>value | Community controls<br>(n=135) | OR (95%CI) for<br>community controls | P<br>value |
|------------------------------------|---------------------|-------------------------|--------------------------------|------------|-------------------------------|--------------------------------------|------------|
| <b>Age, years, median (IQR)</b>    | 53<br>(32, 68)      | 53<br>(32, 68)          | -                              | -          | 53<br>(32, 68)                | -                                    | -          |
| <b>Female, n (%)</b>               | 61 (45)             | 61 (45)                 | -                              | -          | 61 (45)                       | -                                    | -          |
| <b>White, n (%)</b>                | 126 (93)            | 123 (91)                | 1.4 (0.6-3.4)                  | 0.49       | 119 (88)                      | 2.2 (0.8-5.7)                        | 0.11       |
| <b>Education</b>                   |                     |                         |                                |            |                               |                                      |            |
| <b>Missing</b>                     | 20                  | 3                       | -                              | -          | 10                            | -                                    | -          |
| <b>High School or less</b>         | 31 (27)             | 31 (23)                 | 1.5 (0.6-3.3)                  | 0.31       | 47 (38)                       | 0.3 (0.1-0.7)                        | 0.003      |
| <b>Some college</b>                | 36 (31)             | 37 (28)                 | 1.0 (0.5-1.8)                  | 0.77       | 33 (26)                       | 0.5 (0.2-1.1)                        | 0.05       |
| <b>College completion</b>          | 13 (11)             | 24 (18)                 | 0.6 (0.2-1.3)                  | 0.18       | 23 (18)                       | 0.3 (0.1-0.8)                        | 0.007      |
| <b>Graduate education</b>          | 35 (30)             | 40 (30)                 | (ref)                          |            | 22 (18)                       | (ref)                                |            |
| <b>HOUSES, Z (median, IQR)</b>     | -0.2<br>(-1.7, 2.3) | -0.8<br>(-2.6, 2.3)     |                                | 0.17       | -0.6<br>(-2.7, 1.8)           |                                      | 0.05       |
| <b>HOUSES, n (%)</b>               |                     |                         |                                |            |                               |                                      |            |
| <b>Missing</b>                     | 5                   | 6                       | -                              | -          | 6                             | -                                    | -          |
| <b>Q1 (lowest SES)</b>             | 26 (20)             | 38 (30)                 | 0.5 (0.3-1.2)                  | 0.11       | 33 (26)                       | 0.6 (0.3-1.3)                        | 0.19       |
| <b>Q2</b>                          | 33 (25)             | 30 (23)                 | 0.9 (0.5-1.8)                  | 0.81       | 34 (26)                       | 0.8 (0.4-1.7)                        | 0.52       |
| <b>Q3</b>                          | 35 (27)             | 26 (20)                 | 1.1 (0.6-2.1)                  | 0.75       | 36 (28)                       | 0.8 (0.4-1.5)                        | 0.44       |
| <b>Q4</b>                          | 36 (28)             | 35 (27)                 | (ref)                          | (ref)      | 26 (20)                       | (ref)                                |            |
| <b>Seasonal flu vaccine, n (%)</b> | 63 (47)             | 62 (46)                 | 1.0 (0.6-1.7)                  | 0.89       | 50 (37)                       | 1.7 (1.0-3.1)                        | 0.06       |
| <b>PPSV23<sup>a</sup>, n (%)</b>   | 33 (24)             | 39 (29)                 | 0.7 (0.3-1.4)                  | 0.29       | 30 (22)                       | 1.2 (0.6-2.5)                        | 0.59       |
| <b>Smoking exposure, n (%)</b>     |                     |                         |                                |            |                               |                                      |            |
| <b>Undocumented</b>                | 4 (3)               | 3 (2)                   | -                              | -          | 12 (9)                        | -                                    | -          |
| <b>Yes</b>                         | 48 (36)             | 67 (50)                 | 0.5(0.3-0.9)                   | 0.01       | 52 (39)                       | 0.8 (0.4-1.3)                        | 0.33       |
| <b>No</b>                          | 83 (62)             | 65 (48)                 | (ref)                          | (ref)      | 71 (53)                       | (ref)                                |            |

<sup>a</sup> Pneumococcal polysaccharide vaccine 23; Percentages may not add up to 100 due to rounding; Odds ratios and p-values for testing association of each variable with risk of glioma were estimated using conditional logistic regression models to take into account matching between cases and controls. Since age and gender were matching factors, their ORs and p-values are not presented.

**Table 3. Association of asthma with glioma cases compared to different set of controls (conditional logistic regression matching age and sex)**

|                                        | Cases<br>(n=135) | MRI controls<br>(n=135) | OR (95%CI) for<br>MRI controls | P<br>value | Community controls<br>(n=135) | OR (95%CI) for<br>Community controls | P<br>value |
|----------------------------------------|------------------|-------------------------|--------------------------------|------------|-------------------------------|--------------------------------------|------------|
| <b>Asthma PAC<sup>a</sup>, n (%)</b>   | 21 (16)          | 36 (27)                 | 0.5 (0.3-0.9)                  | 0.02       | 17 (13)                       | 1.3 (0.6-2.6)                        | 0.48       |
| <b>Asthma activity, n (%)</b>          |                  |                         |                                |            |                               |                                      |            |
| <b>No asthma</b>                       | 114 (84)         | 99 (73)                 | (ref)                          | (ref)      | 118 (87)                      | (ref)                                | (ref)      |
| <b>Inactive asthma</b>                 | 11 (8)           | 16 (12)                 | 0.6 (0.3-1.3)                  | 0.17       | 8 (6)                         | 1.4 (0.5-3.8)                        | 0.46       |
| <b>Active asthma</b>                   | 10 (7)           | 20 (15)                 | 0.4 (0.2-0.9)                  | 0.03       | 9 (7)                         | 1.1 (0.4-3.2)                        | 0.79       |
| <b>Asthma control, n (%)</b>           |                  |                         |                                |            |                               |                                      |            |
| <b>No asthma</b>                       | 114 (84)         | 99 (73)                 | (ref)                          | (ref)      | 118 (87)                      | (ref)                                | (ref)      |
| <b>Not poorly controlled asthma</b>    | 19 (14)          | 29 (21)                 | 0.6 (0.3-1.1)                  | 0.11       | 14 (10)                       | 1.5 (0.7-3.0)                        | 0.31       |
| <b>Poorly controlled asthma</b>        | 1 (1)            | 7 (5)                   | 0.1 (0.02-1.1)                 | 0.05       | 3 (2)                         | 0.3 (0.04-3.5)                       | 0.38       |
| <b>Eczema, n (%)</b>                   | 11 (8)           | 17 (13)                 | 0.6 (0.3-1.4)                  | 0.22       | 7 (5)                         | 1.7 (0.6-4.6)                        | 0.32       |
| <b>Allergic rhinitis, n (%)</b>        | 28 (21)          | 30 (22)                 | 1.0 (0.5-1.6)                  | 0.76       | 23 (17)                       | 1.3 (0.7-2.4)                        | 0.43       |
| <b>Family history of asthma, n (%)</b> |                  |                         |                                |            |                               |                                      |            |
| <b>Undocumented</b>                    | 34 (25)          | 36 (27)                 | -                              | -          | 51 (38)                       | -                                    | -          |
| <b>Yes</b>                             | 12 (9)           | 15 (11)                 | 0.8 (0.3-1.7)                  | 0.49       | 7 (5)                         | 1.5 (0.5-4.1)                        | 0.46       |
| <b>No</b>                              | 89 (66)          | 84 (62)                 | (ref)                          | (ref)      | 77 (57)                       | (ref)                                | (ref)      |

1  
2  
3  
4  
5  
6  
7  
8  
9  
10  
11  
12  
13  
14  
15  
16  
17  
18  
19  
20  
21  
22  
23  
24  
25  
26  
27  
28  
29  
30  
31  
32  
33  
34  
35  
36  
37  
38  
39  
40  
41  
42  
43  
44  
45  
46  
47

**Table 4. Multivariable analysis for comparing asthma and risk of glioma using MRI controls**

|                              | <b>Adj. Odds Ratio</b> | <b>95% CI</b> | <b>P-value</b> |
|------------------------------|------------------------|---------------|----------------|
| <b>Asthma PAC (ref="No")</b> | 0.48                   | 0.21 -1.09    | 0.08           |
| <b>Propensity scores*</b>    | 1.03                   | 0.11- 9.54    | 0.98           |

\*Propensity scores were formulated based on Race, education, HOUSES, seasonal flu vaccine, PPSV23, and smoking exposure status to control confounders and covariates and entered the model as a variable.

For peer review only

**eTable 1. Summary of literature of epidemiologic studies on asthma and risk of glioma**

| Authors                                                                                | Study design                                                   | Study subjects (data source)                                                                                                                                                                                                                      | Definition of glioma                                                                        | Definition of asthma                  | Results (effect size)                                                                                                                                                                                                      | Conclusion                                                                                |
|----------------------------------------------------------------------------------------|----------------------------------------------------------------|---------------------------------------------------------------------------------------------------------------------------------------------------------------------------------------------------------------------------------------------------|---------------------------------------------------------------------------------------------|---------------------------------------|----------------------------------------------------------------------------------------------------------------------------------------------------------------------------------------------------------------------------|-------------------------------------------------------------------------------------------|
| <b>A. Statistically significant inverse association</b>                                |                                                                |                                                                                                                                                                                                                                                   |                                                                                             |                                       |                                                                                                                                                                                                                            |                                                                                           |
| <b>Adults</b>                                                                          |                                                                |                                                                                                                                                                                                                                                   |                                                                                             |                                       |                                                                                                                                                                                                                            |                                                                                           |
| 1. McCarthy et al, 3 countries (US, Sweden, Denmark), 2011(1)                          | Case-control study                                             | -Cases: 410 (five case-control studies)<br>-Controls: 840 (same hospital, random-digit-dialing, friends, or population-based)<br>-Adults only                                                                                                     | Histologically confirmed glioma (oligodendroglioma, anaplastic oligodendroglioma)           | Survey: history of asthma (not clear) | aOR (95% CI): 0.4 (0.2, 0.7) (adjusted for age, group, gender, and site)                                                                                                                                                   | History of asthma was associated with a decreased risk of glioma                          |
| 2. Wiemels et al, USA, 2002(2)                                                         | Population-based case-control study                            | -Cases: 405 (cancer registry)<br>-Controls: 402 (random digit dialing methods)<br>-Adults only                                                                                                                                                    | Glioma confirmed by the Northern California Cancer Center's rapid case ascertainment system | Survey: history of wheezing           | aOR (95% CI): 0.57 (0.38-0.86) (adjusted for age, gender, and ethnicity)                                                                                                                                                   | Cases were less likely than controls to report wheezing (history of asthma not available) |
| 3. Safaeian et al, USA, 2013(3)                                                        | Case-control study                                             | -Cases: 851 with European ancestry (two case-controls studies and three prospective cohort studies)<br>-Controls: 3,977 (same hospitals, driver identification records, or Health Care Financing Administration Medicare Records)<br>-Adults only | Histologically confirmed glioma                                                             | Survey: history of asthma             | aOR (95%CI): 0.58 (0.42-0.81) (adjusted for age, gender, and study)                                                                                                                                                        | Reporting asthma was associated with reduced risks of glioma.                             |
| 4. Wigertz et al, 5 countries (Denmark, Norway, Finland, Sweden, and England), 2007(4) | Population-based case-control study (part of INTERPHONE study) | -Case: 1,527 (treating clinics)<br>-Control: 3,309 (population registers)<br>-Adults only                                                                                                                                                         | Glioma confirmed by cancer registries                                                       | Survey: history of asthma             | 1. aOR (95%CI): 0.65 (0.51-0.82) overall<br>2. aOR (95%CI): 0.68 (0.51-0.91) for current asthma<br>3. aOR (95%CI): 0.53 (0.34-0.80) for past asthma (adjusted for age, sex, education, country, and region within country) | There were reduced risks for glioma related to both current and past asthma.              |
| 5. Schoemaker et al, UK, 2006(5)                                                       | Population-based case-control study                            | -Cases: 965 (hospitals or cancer registry)<br>-Controls: 1,716 (general practitioner patient lists)<br>-Adults only                                                                                                                               | Glioma by ICD codes                                                                         | Survey: history of asthma             | aOR (95%CI): 0.71 (0.54-0.92) (adjusted for age, sex, category, region, Survey year, and Townsend deprivation category)                                                                                                    | Risk of glioma was reduced in subjects reporting a history of asthma.                     |

1  
2  
3  
4  
5  
6  
7  
8  
9  
10  
11  
12  
13  
14  
15  
16  
17  
18  
19  
20  
21  
22  
23  
24  
25  
26  
27  
28  
29  
30  
31  
32  
33  
34  
35  
36  
37  
38  
39  
40  
41  
42  
43  
44  
45  
46  
47

|                                                                                       |                                                                 |                                                                                                                                                             |                                                                           |                           |                                                                                                                                                                                                                                                                                 |                                                                                                                                                                                            |
|---------------------------------------------------------------------------------------|-----------------------------------------------------------------|-------------------------------------------------------------------------------------------------------------------------------------------------------------|---------------------------------------------------------------------------|---------------------------|---------------------------------------------------------------------------------------------------------------------------------------------------------------------------------------------------------------------------------------------------------------------------------|--------------------------------------------------------------------------------------------------------------------------------------------------------------------------------------------|
| 6.Turner et al, 5 countries (Australia, Canada, France, Israel, New Zealand), 2013(6) | International population-based case-control study (INTERPHONE)  | -Cases: 793 (hospitals or nationwide (Israel))<br>-Controls: 2,374 (electoral lists, health/population registries, or random digit dialing)<br>-Adults only | Histologically confirmed glioma or through unequivocal diagnostic imaging | Survey: history of asthma | aOR (95%CI): 0.72 (0.54-0.96)<br>-By age of asthma onset<br>a. <10yrs: 0.85 (0.55-1.33)<br>b. 10-19yrs: 0.86 (0.45-1.64)<br>c. 20+yrs: 0.58 (0.38-0.89)<br>-By grade of glioma<br>a. High grade: 0.62 (0.43-0.88)<br>b. Low grade: 0.89 (0.58-1.37)<br>(adjusted for education) | There was some evidence that the inverse associations with asthma strengthened with increasing age of asthma onset or grade of glioma and weakened with longer time since onset of asthma. |
| 7.Brenner et al, USA, 2002(7)                                                         | Hospital-based case-control study                               | -Cases: 489 (3 hospitals)<br>-Controls (hospitalized for a non-malignant conditions)<br>-Adults only                                                        | Histologically confirmed glioma                                           | Survey: history of asthma | aOR (95%CI): 0.63 (0.43-0.92)<br>(adjusted for age, sex, and postal code)                                                                                                                                                                                                       | There was a significant inverse association between glioma and history of asthma.                                                                                                          |
| <b>B. Statistically non-significant inverse or positive association</b>               |                                                                 |                                                                                                                                                             |                                                                           |                           |                                                                                                                                                                                                                                                                                 |                                                                                                                                                                                            |
| <b>B.1. Adults</b>                                                                    |                                                                 |                                                                                                                                                             |                                                                           |                           |                                                                                                                                                                                                                                                                                 |                                                                                                                                                                                            |
| 8.Ryan et al, Australia, 1992(8)                                                      | Population-based case-control study                             | -Cases: 110 (cancer registry)<br>-Controls: 417 (electoral roll)<br>-Adults only                                                                            | Histologically confirmed glioma                                           | Survey: history of asthma | aRR (95% CI): 0.40 (0.1-1.1)<br>(adjusted for age and sex)                                                                                                                                                                                                                      | A history of atopy or allergic phenomena may be associated with a decreased risk of glioma.                                                                                                |
| 9.Schwartzbaum et al, Sweden, 2005(9)                                                 | Population-based case-control study                             | -Cases: 111 (brain tumor treatment center and regional cancer registries)<br>-Controls: 422 (population registry)<br>-Adults only                           | Glioblastoma multiforme                                                   | Survey: history of asthma | OR (95%CI): 0.64 (0.33-1.25)                                                                                                                                                                                                                                                    | Self-report asthma was inversely related to glioma. Three out of four SNPs previously associated with asthma supported inverse association between asthma and glioma                       |
| 10.Berg-Beckhoff et al, German, 2009(10)                                              | Population-based case-control study (part of INTERPHONE study)  | -Cases: 365 (neurosurgical clinics)<br>-Controls: 732 (population registries)<br>-Adults only                                                               | Histologically confirmed glioma                                           | Survey: history of asthma | aOR (95%CI): 0.65 (0.36-1.19)<br>(adjusted for socioeconomic status, urban vs. rural, smoking history, and age at diagnosis)                                                                                                                                                    | The adjusted odds ratios did not reveal any statistical significant associations between asthma and the occurrence of glioma with yet pointing towards an inverse association.             |
| 11. Pouchieu et al, France, 2018(11)                                                  | Multicenter population-based case-control study (CERENAT study) | -Cases: 273 (cancer registry )<br>-Controls: 546 (local electoral rolls)<br>-Adults only                                                                    | Histopathological diagnosis OR imaging and clinical diagnosis             | Survey: history of asthma | aOR (95% CI): 0.70 (0.37-1.32)<br>(adjusted for educational level and mobile phone use)                                                                                                                                                                                         | History of asthma had an inverse association with glioma, but this association was not statistically significant.                                                                          |
| 12.Schlehofer                                                                         | International                                                   | -Cases:1,178 (hospitals or                                                                                                                                  | Histologically                                                            | Survey: history of        | RR (95%CI): 0.75 (0.55-                                                                                                                                                                                                                                                         | There was a statistically                                                                                                                                                                  |



|                                                 |                                                                                      |                                                             |                                                                                                                                                                                                                 |                                                         |                                                                                                       |                                                                                                                                     |                                                                                                                                                                                                                                      |
|-------------------------------------------------|--------------------------------------------------------------------------------------|-------------------------------------------------------------|-----------------------------------------------------------------------------------------------------------------------------------------------------------------------------------------------------------------|---------------------------------------------------------|-------------------------------------------------------------------------------------------------------|-------------------------------------------------------------------------------------------------------------------------------------|--------------------------------------------------------------------------------------------------------------------------------------------------------------------------------------------------------------------------------------|
| 1<br>2<br>3<br>4<br>5<br>6<br>7<br>8<br>9<br>10 | r et al, 6 countries (Australia, Canada, France, Germany, Sweden, and USA), 1999(12) | population-based case-control study                         | cancer registries)<br>-Controls: 1,987 (population-based controls using different methods depending on each center)<br>-Adults only                                                                             | confirmed glioma                                        | asthma                                                                                                | 1.03)                                                                                                                               | significant inverse association between glioma and asthma.                                                                                                                                                                           |
| 11<br>12<br>13<br>14<br>15<br>16                | 13. Cahoon et al, USA, 2014(13)                                                      | Retrospective cohort study                                  | -4.5 million of male veterans of the USA<br>-4,383 incident, primary brain cancer cases (95% glioma) developed<br>-Adults only (18-100 years)                                                                   | ICD codes                                               | Discharge diagnosis code of asthma ( $\geq 2$ years between diagnosis of asthma and end of follow-up) | RR (95%CI): 0.8 (0.6-1.07)                                                                                                          | This study lends some support to an inverse association between asthma of long duration and risk of brain cancer (not exclusively glioma)                                                                                            |
| 17<br>18<br>19                                  | 14. Cicuttini et al, Australia, 1997 (14)                                            | Population-based case-control study                         | -Cases: 416 (cancer registry)<br>-Controls: 422 (electoral roll)<br>-Adults only                                                                                                                                | Histologically confirmed glioma                         | Survey: history of asthma                                                                             | aOR (95%CI): 0.8 (0.5-1.2) (adjusted for age and sex)                                                                               | There was no significant association between asthma and the risk of developing glioma.                                                                                                                                               |
| 20<br>21<br>22<br>23<br>24<br>25<br>26<br>27    | 15. Il'yasova, USA, 2009(15)                                                         | Clinic-based case-control study with three sets of controls | Cases: 388 (two hospitals)<br>Controls: 80 siblings and 191 friends recommended by patient, and 177 clinic-based controls (actively from orthopedic clinics and using flyers placed in clinics)<br>-Adults only | ICD codes                                               | Web-based or telephone survey: history of asthma                                                      | OR (95%CI)<br>-Clinic-based controls: 1.90 (0.89-4.07)<br>-Sibling controls: 0.43 (0.19-1.00)<br>-Friend controls: 0.84 (0.47-1.50) | Asthma showed an inverse association only in the comparison with sibling controls, but not with clinic-based or friend controls. Clinic based controls generally better approximate the prevalence data for population-based groups. |
| 28<br>29<br>30<br>31<br>32<br>33<br>34          | 16. Dobbins et al, UK and US, 2011(16)                                               | Multicenter case-control series                             | -Cases: 1,878 (UK GWA study through INTERPHONE study and one US cancer center)<br>-Controls: 3670 (UK Birth Cohort and US CGEMS study)                                                                          | Histologically confirmed or based on diagnostic imaging | SNPs known to be related to asthma (rs7216389, rs1588265, rs1420101)                                  | OR (95%CI) trend for rs7216389 (ORMDL3 at 17q21): 1.10 (1.01-1.19)                                                                  | The observation provides evidence of a positive association between asthma and glioma                                                                                                                                                |
| 35                                              | <b>B.2. Children</b>                                                                 |                                                             |                                                                                                                                                                                                                 |                                                         |                                                                                                       |                                                                                                                                     |                                                                                                                                                                                                                                      |
| 36<br>37<br>38<br>39<br>40                      | 17. Harding et al, UK, 2008(17)                                                      | Population-based case-control study                         | -Cases: 326 (UK Childhood Cancer Study)<br>-Controls: 6,292 (health authorities or health boards)<br>-Children only                                                                                             | ICD-O codes for glioma                                  | Survey: mother's report for child's history of asthma                                                 | aOR (95%CI): 0.90 (0.66-1.23) (adjusted for Townsend deprivation category)                                                          | Asthma by parental report was not associated with glioma.                                                                                                                                                                            |
| 41<br>42<br>43<br>44<br>45<br>46<br>47          | 18. Shu et al,                                                                       | Population-                                                 | -Cases: 352 (cancer                                                                                                                                                                                             | Histologically                                          | Survey: parent's                                                                                      | aOR (95%CI)                                                                                                                         | There was no association                                                                                                                                                                                                             |

1  
2  
3  
4  
5  
6  
7  
8  
9  
10  
11  
12  
13  
14  
15  
16  
17  
18  
19  
20  
21  
22  
23  
24  
25  
26  
27  
28  
29  
30  
31  
32  
33  
34  
35  
36  
37  
38  
39  
40  
41  
42  
43  
44  
45  
46  
47

|                                                    |                                                    |                                                                         |                                                                                                                                            |                                      |                                                                                                                                                           |                                    |
|----------------------------------------------------|----------------------------------------------------|-------------------------------------------------------------------------|--------------------------------------------------------------------------------------------------------------------------------------------|--------------------------------------|-----------------------------------------------------------------------------------------------------------------------------------------------------------|------------------------------------|
| Denmark, Norway, Sweden, and Switzerland, 2014(18) | based case control study (CEFALO)                  | registries)<br>-Controls: 646 (population registries)<br>-Children only | confirmed glioma or through unequivocal diagnostic imaging                                                                                 | report for child's history of asthma | -Overall: 0.99 (0.54-1.82)<br>-Current: 0.97 (0.42-2.25)<br>-Past: 0.80 (0.36-2.22) (adjusted for living on a farm before age 6 and socioeconomic status) | between asthma and risk of glioma. |
| <b>C. Systematic review and meta-analysis</b>      |                                                    |                                                                         |                                                                                                                                            |                                      |                                                                                                                                                           |                                    |
| <b>Author</b>                                      | <b>Study design</b>                                | <b>Study subjects</b>                                                   | <b>Conclusion</b>                                                                                                                          |                                      |                                                                                                                                                           |                                    |
| 19.Zhang et al, 2017(19)                           | Meta-analysis of 9 case control and cohort studies | Cases: 8,435<br>Controls: 118,719                                       | The pooled result indicated that asthma would reduce the risk of glioma by 33% (OR = 0.67, 95% CI = 0.59-0.75, <i>P</i> < 0.001)           |                                      |                                                                                                                                                           |                                    |
| 20.Chen et al, 2010(20)                            | Meta-analysis of 7 case-control studies            | Cases: 5,317<br>Controls: 9,393                                         | The pooled OR for glioma and asthma was 0.70 (95% CI: 0.62-0.79, <i>P</i> <0.001)                                                          |                                      |                                                                                                                                                           |                                    |
| 21.Linos et al, 2007(21)                           | Meta-analysis of 5 case-control studies            | Cases: 3,450<br>participants : 53,223                                   | Pooled RR for glioma among those reporting a history of asthma compared with no such history was 0.68 (95% CI = 0.58-0.80, <i>P</i> <.001) |                                      |                                                                                                                                                           |                                    |

**eTable 2. Indications for testing MRI among MRI negative controls (n=135)**

| <b>Pain (headache)</b> | <b>Stroke (ischemia)</b> | <b>Cranial nerve, vision/ hearing issue</b> | <b>Dementia (memory), psychiatric</b> | <b>Dizziness, syncope</b> | <b>Spell, seizure</b> | <b>Others*</b> | <b>Research</b> |
|------------------------|--------------------------|---------------------------------------------|---------------------------------------|---------------------------|-----------------------|----------------|-----------------|
| 31<br>(23%)            | 23<br>(17%)              | 22<br>(16.5%)                               | 13<br>(9.5%)                          | 13<br>(9.5%)              | 13<br>(9.5%)          | 10<br>(7.5%)   | 10<br>(7.5%)    |

\* Others include developmental concern pituitary concern, and deep brain stimulation.

1  
2  
3  
4  
5  
6  
7  
8  
9  
10  
11  
12  
13  
14  
15  
16  
17  
18  
19  
20  
21  
22  
23  
24  
25  
26  
27  
28  
29  
30  
31  
32  
33  
34  
35  
36  
37  
38  
39  
40  
41  
42  
43  
44  
45  
46  
47

**eFigure1. Number of Cases and Controls after applying the exclusion criteria**

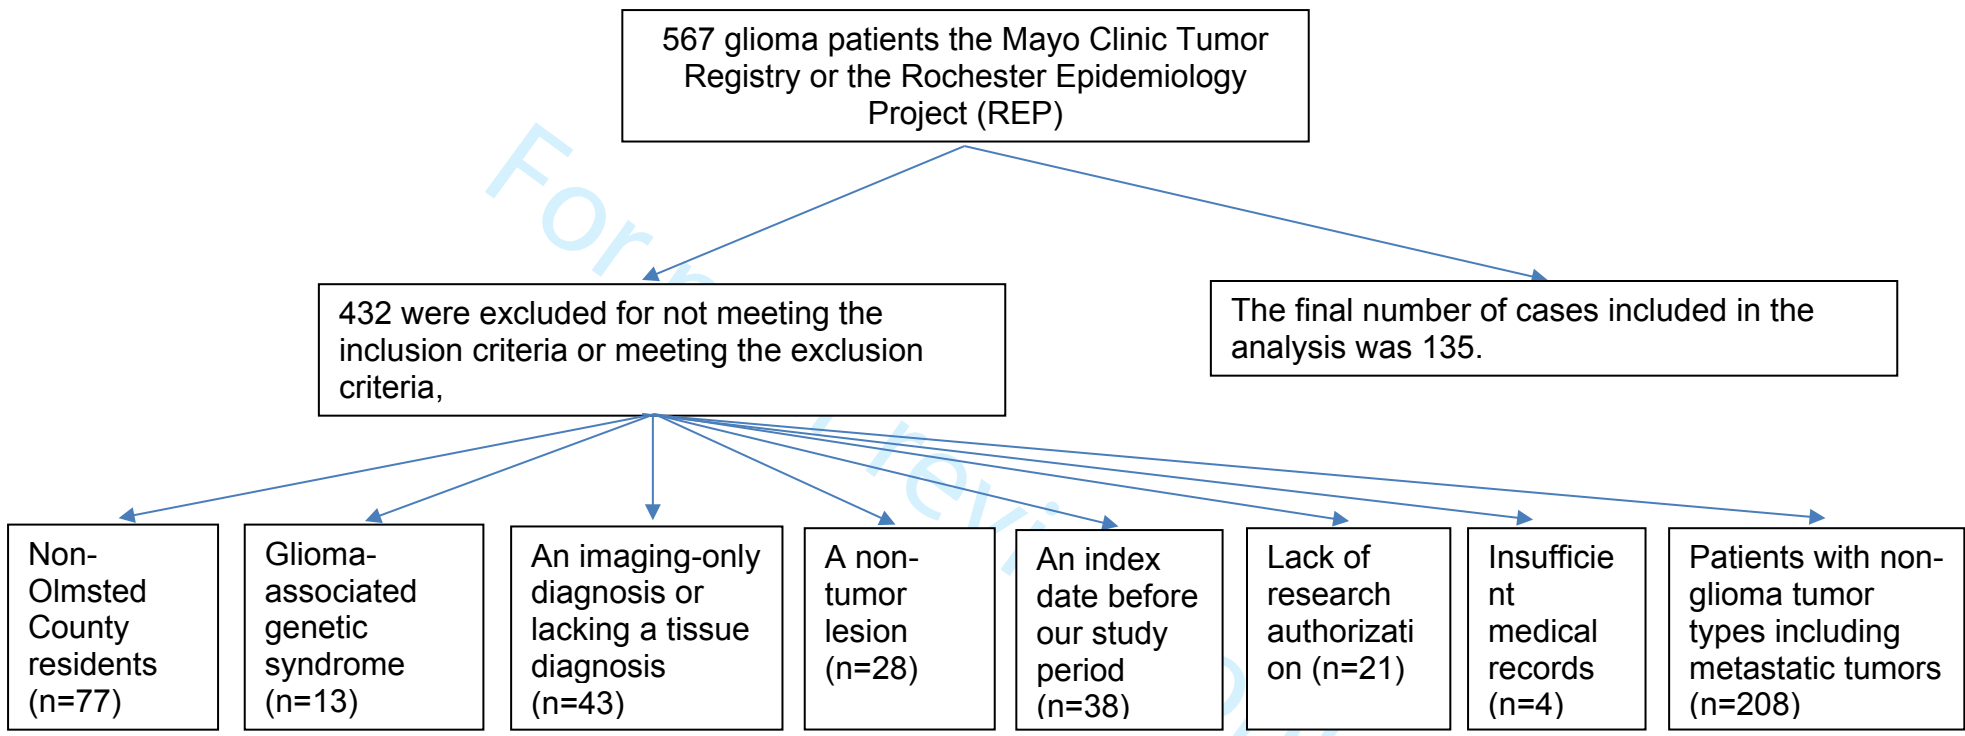

## References:

1. McCarthy BJ, Rankin KM, Aldape K, Bondy ML, Brannstrom T, Broholm H, et al. Risk factors for oligodendroglial tumors: a pooled international study. *Neuro Oncol*. 2011;13(2):242-50.
2. Brenner AV, Linet MS, Fine HA, Shapiro WR, Selker RG, Black PM, et al. History of allergies and autoimmune diseases and risk of brain tumors in adults. *Int J Cancer*. 2002;99(2):252-9.
3. Wiemels JL, Wiencke JK, Sison JD, Miike R, McMillan A, Wrensch M. History of allergies among adults with glioma and controls. *Int J Cancer*. 2002;98(4):609-15.
4. Safaeian M, Rajaraman P, Hartge P, Yeager M, Linet M, Butler MA, et al. Joint effects between five identified risk variants, allergy, and autoimmune conditions on glioma risk. *Cancer Cause Control*. 2013;24(10):1885-91.
5. Wigertz A, Lonn S, Schwartzbaum J, Hall P, Auvinen A, Christensen HC, et al. Allergic conditions and brain tumor risk. *American journal of epidemiology*. 2007;166(8):941-50.
6. Schoemaker MJ, Swerdlow AJ, Hepworth SJ, McKinney PA, van Tongeren M, Muir KR. History of allergies and risk of glioma in adults. *Int J Cancer*. 2006;119(9):2165-72.
7. Turner MC, Krewski D, Armstrong BK, Chetrit A, Giles GG, Hours M, et al. Allergy and brain tumors in the INTERPHONE study: pooled results from Australia, Canada, France, Israel, and New Zealand. *Cancer Causes Control*. 2013;24(5):949-60.
8. Brenner AV, Linet MS, Fine HA, Shapiro WR, Selker RG, Black PM, et al. History of allergies and autoimmune diseases and risk of brain tumors in adults. *Int J Cancer*. 2002;99(2):252-9.
9. Ryan P, Lee MW, North B, McMichael AJ. Risk factors for tumors of the brain and meninges: results from the Adelaide Adult Brain Tumor Study. *Int J Cancer*. 1992;51(1):20-7.
10. Schwartzbaum J, Ahlbom A, Malmer B, Lonn S, Brookes AJ, Doss H, et al. Polymorphisms associated with asthma are inversely related to glioblastoma multiforme. *Cancer Res*. 2005;65(14):6459-65.
11. Berg-Beckhoff G, Schuz J, Blettner M, Munster E, Schlaefer K, Wahrendorf J, et al. History of allergic disease and epilepsy and risk of glioma and meningioma (INTERPHONE study group, Germany). *Eur J Epidemiol*. 2009;24(8):433-40.
12. Pouchieu C, Raheison C, Piel C, Migault L, Carles C, Fabbro-Perray P, et al. Allergic conditions and risk of glioma and meningioma in the CERENAT case-control study. *J Neurooncol*. 2018;138(2):271-81.
13. Schlehofer B, Blettner M, Preston-Martin S, Niehoff D, Wahrendorf J, Arslan A, et al. Role of medical history in brain tumour development. Results from the international adult brain tumour study. *Int J Cancer*. 1999;82(2):155-60.
14. Cahoon EK, Inskip PD, Gridley G, Brenner AV. Immune-related conditions and subsequent risk of brain cancer in a cohort of 4.5 million male US veterans. *Br J Cancer*. 2014;110(7):1825-33.
15. Cicuttini FM, Hurley SF, Forbes A, Donnan GA, Salzberg M, Giles GG, et al. Association of adult glioma with medical conditions, family and reproductive history. *Int J Cancer*. 1997;71(2):203-7.
16. Il'yasova D, McCarthy B, Marcello J, Schildkraut JM, Moorman PG, Krishnamachari B, et al. Association between glioma and history of allergies, asthma, and eczema: a case-control study with three groups of controls. *Cancer Epidemiol Biomarkers Prev*. 2009;18(4):1232-8.

16. Dobbins SE, Hosking FJ, Shete S, Armstrong G, Swerdlow A, Liu Y, et al. Allergy and glioma risk: test of association by genotype. *Int J Cancer*. 2011;128(7):1736-40.
17. Harding NJ, Birch JM, Hepworth SJ, McKinney PA. Atopic dysfunction and risk of central nervous system tumours in children. *Eur J Cancer*. 2008;44(1):92-9.
18. Shu X, Prochazka M, Lannering B, Schuz J, Roosli M, Tynes T, et al. Atopic conditions and brain tumor risk in children and adolescents--an international case-control study (CEFALO). *Ann Oncol*. 2014;25(4):902-8.
19. Zhang C, Zhu QX. Allergy is associated with reduced risk of glioma: A meta-analysis. *Allergol Immunopathol (Madr)*. 2017;45(6):553-9.
20. Chen C, Xu T, Chen J, Zhou J, Yan Y, Lu Y, et al. Allergy and risk of glioma: a meta-analysis. *Eur J Neurol*. 2011;18(3):387-95.
21. Linos E, Raine T, Alonso A, Michaud D. Atopy and risk of brain tumors: a meta-analysis. *Journal of the National Cancer Institute*. 2007;99(20):1544-50.

1  
2  
3  
4  
5  
6  
7  
8  
9  
10  
11  
12  
13  
14  
15  
16  
17  
18  
19  
20  
21  
22  
23  
24  
25  
26  
27  
28  
29  
30  
31  
32  
33  
34  
35  
36  
37  
38  
39  
40  
41  
42  
43  
44  
45  
46  
47

For peer review only

## STROBE (Strengthening The Reporting of OBServational Studies in Epidemiology) Checklist

A checklist of items that should be included in reports of observational studies. You must report the page number in your manuscript where you consider each of the items listed in this checklist. If you have not included this information, either revise your manuscript accordingly before submitting or note N/A.

**Note:** An Explanation and Elaboration article discusses each checklist item and gives methodological background and published examples of transparent reporting. The STROBE checklist is best used in conjunction with this article (freely available on the Web sites of PLoS Medicine at <http://www.plosmedicine.org/>, Annals of Internal Medicine at <http://www.annals.org/>, and Epidemiology at <http://www.epidem.com/>). Information on the STROBE Initiative is available at [www.strobe-statement.org](http://www.strobe-statement.org).

| Section and Item     | Item No. | Recommendation                                                                                                                                                                                                                                                                                                                                                                                                                                                                 | Reported on Page No. |
|----------------------|----------|--------------------------------------------------------------------------------------------------------------------------------------------------------------------------------------------------------------------------------------------------------------------------------------------------------------------------------------------------------------------------------------------------------------------------------------------------------------------------------|----------------------|
| Title and Abstract   | 1        | (a) Indicate the study's design with a commonly used term in the title or the abstract                                                                                                                                                                                                                                                                                                                                                                                         |                      |
|                      |          | (b) Provide in the abstract an informative and balanced summary of what was done and what was found                                                                                                                                                                                                                                                                                                                                                                            |                      |
| <b>Introduction</b>  |          |                                                                                                                                                                                                                                                                                                                                                                                                                                                                                |                      |
| Background/Rationale | 2        | Explain the scientific background and rationale for the investigation being reported                                                                                                                                                                                                                                                                                                                                                                                           |                      |
| Objectives           | 3        | State specific objectives, including any prespecified hypotheses                                                                                                                                                                                                                                                                                                                                                                                                               |                      |
| <b>Methods</b>       |          |                                                                                                                                                                                                                                                                                                                                                                                                                                                                                |                      |
| Study Design         | 4        | Present key elements of study design early in the paper                                                                                                                                                                                                                                                                                                                                                                                                                        |                      |
| Setting              | 5        | Describe the setting, locations, and relevant dates, including periods of recruitment, exposure, follow-up, and data collection                                                                                                                                                                                                                                                                                                                                                |                      |
| Participants         | 6        | (a) <i>Cohort study</i> —Give the eligibility criteria, and the sources and methods of selection of participants. Describe methods of follow-up<br><br><i>Case-control study</i> —Give the eligibility criteria, and the sources and methods of case ascertainment and control selection. Give the rationale for the choice of cases and controls<br><br><i>Cross-sectional study</i> —Give the eligibility criteria, and the sources and methods of selection of participants |                      |
|                      |          | (b) <i>Cohort study</i> —For matched studies, give matching criteria and number of exposed and unexposed<br><br><i>Case-control study</i> —For matched studies, give matching criteria and the number of controls per case                                                                                                                                                                                                                                                     |                      |
| Variables            | 7        | Clearly define all outcomes, exposures, predictors, potential confounders, and effect modifiers. Give diagnostic criteria, if applicable                                                                                                                                                                                                                                                                                                                                       |                      |



| Section and Item             | Item No. | Recommendation                                                                                                                                                                                                                                                                                            | Reported on Page No. |
|------------------------------|----------|-----------------------------------------------------------------------------------------------------------------------------------------------------------------------------------------------------------------------------------------------------------------------------------------------------------|----------------------|
| Data Sources/<br>Measurement | 8*       | For each variable of interest, give sources of data and details of methods of assessment (measurement). Describe comparability of assessment methods if there is more than one group                                                                                                                      |                      |
| Bias                         | 9        | Describe any efforts to address potential sources of bias                                                                                                                                                                                                                                                 |                      |
| Study Size                   | 10       | Explain how the study size was arrived at                                                                                                                                                                                                                                                                 |                      |
| Quantitative Variables       | 11       | Explain how quantitative variables were handled in the analyses. If applicable, describe which groupings were chosen and why                                                                                                                                                                              |                      |
| Statistical Methods          | 12       | (a) Describe all statistical methods, including those used to control for confounding                                                                                                                                                                                                                     |                      |
|                              |          | (b) Describe any methods used to examine subgroups and interactions                                                                                                                                                                                                                                       |                      |
|                              |          | (c) Explain how missing data were addressed                                                                                                                                                                                                                                                               |                      |
|                              |          | (d) <i>Cohort study</i> —If applicable, explain how loss to follow-up was addressed<br><i>Case-control study</i> —If applicable, explain how matching of cases and controls was addressed<br><i>Cross-sectional study</i> —If applicable, describe analytical methods taking account of sampling strategy |                      |
|                              |          | (e) Describe any sensitivity analyses                                                                                                                                                                                                                                                                     |                      |
| <b>Results</b>               |          |                                                                                                                                                                                                                                                                                                           |                      |
| Participants                 | 13*      | (a) Report numbers of individuals at each stage of study—eg numbers potentially eligible, examined for eligibility, confirmed eligible, included in the study, completing follow-up, and analysed                                                                                                         |                      |
|                              |          | (b) Give reasons for non-participation at each stage                                                                                                                                                                                                                                                      |                      |
|                              |          | (c) Consider use of a flow diagram                                                                                                                                                                                                                                                                        |                      |
| Descriptive Data             | 14*      | (a) Give characteristics of study participants (eg demographic, clinical, social) and information on exposures and potential confounders                                                                                                                                                                  |                      |
|                              |          | (b) Indicate number of participants with missing data for each variable of interest                                                                                                                                                                                                                       |                      |
|                              |          | (c) <i>Cohort study</i> —Summarise follow-up time (eg, average and total amount)                                                                                                                                                                                                                          |                      |
| Outcome Data                 | 15*      | <i>Cohort study</i> —Report numbers of outcome events or summary measures over time                                                                                                                                                                                                                       |                      |
|                              |          | <i>Case-control study</i> —Report numbers in each exposure category, or summary measures of exposure                                                                                                                                                                                                      |                      |
|                              |          | <i>Cross-sectional study</i> —Report numbers of outcome events or summary measures                                                                                                                                                                                                                        |                      |

| Section and Item         | Item No. | Recommendation                                                                                                                                                                                               | Reported on Page No. |
|--------------------------|----------|--------------------------------------------------------------------------------------------------------------------------------------------------------------------------------------------------------------|----------------------|
| Main Results             | 16       | (a) Give unadjusted estimates and, if applicable, confounder-adjusted estimates and their precision (eg, 95% confidence interval). Make clear which confounders were adjusted for and why they were included |                      |
|                          |          | (b) Report category boundaries when continuous variables were categorized                                                                                                                                    |                      |
|                          |          | (c) If relevant, consider translating estimates of relative risk into absolute risk for a meaningful time period                                                                                             |                      |
| Other Analyses           | 17       | Report other analyses done—eg analyses of subgroups and interactions, and sensitivity analyses                                                                                                               |                      |
| <b>Discussion</b>        |          |                                                                                                                                                                                                              |                      |
| Key Results              | 18       | Summarise key results with reference to study objectives                                                                                                                                                     |                      |
| Limitations              | 19       | Discuss limitations of the study, taking into account sources of potential bias or imprecision. Discuss both direction and magnitude of any potential bias                                                   |                      |
| Interpretation           | 20       | Give a cautious overall interpretation of results considering objectives, limitations, multiplicity of analyses, results from similar studies, and other relevant evidence                                   |                      |
| Generalisability         | 21       | Discuss the generalisability (external validity) of the study results                                                                                                                                        |                      |
| <b>Other Information</b> |          |                                                                                                                                                                                                              |                      |
| Funding                  | 22       | Give the source of funding and the role of the funders for the present study and, if applicable, for the original study on which the present article is based                                                |                      |

\*Give information separately for cases and controls in case-control studies and, if applicable, for exposed and unexposed groups in cohort and cross-sectional studies.

**Once you have completed this checklist, please save a copy and upload it as part of your submission. DO NOT include this checklist as part of the main manuscript document. It must be uploaded as a separate file.**
