# Supplementary material for: Asthma and risk of glioma: a population-based case–control study
Source: PubMed Central journal article supplement — BMJ Open. 2019 Jun 17;9(6):e025746. doi: 10.1136/bmjopen-2018-025746 (PMC6589041; doi:10.1136/bmjopen-2018-025746), 2019-06-17
Supplement: bmjopen-2018-025746supp001.pdf [file bmjopen-2018-025746supp001.pdf]

**eTable 1. Summary of literature of epidemiologic studies on asthma and risk of glioma**

| Authors                                                                                | Study design                                                   | Study subjects (data source)                                                                                                                                                                                                                      | Definition of glioma                                                                        | Definition of asthma                  | Results (effect size)                                                                                                                                                                                                      | Conclusion                                                                                |
|----------------------------------------------------------------------------------------|----------------------------------------------------------------|---------------------------------------------------------------------------------------------------------------------------------------------------------------------------------------------------------------------------------------------------|---------------------------------------------------------------------------------------------|---------------------------------------|----------------------------------------------------------------------------------------------------------------------------------------------------------------------------------------------------------------------------|-------------------------------------------------------------------------------------------|
| <b>A. Statistically significant inverse association</b>                                |                                                                |                                                                                                                                                                                                                                                   |                                                                                             |                                       |                                                                                                                                                                                                                            |                                                                                           |
| <b>Adults</b>                                                                          |                                                                |                                                                                                                                                                                                                                                   |                                                                                             |                                       |                                                                                                                                                                                                                            |                                                                                           |
| 1. McCarthy et al, 3 countries (US, Sweden, Denmark), 2011(1)                          | Case-control study                                             | -Cases: 410 (five case-control studies)<br>-Controls: 840 (same hospital, random-digit-dialing, friends, or population-based)<br>-Adults only                                                                                                     | Histologically confirmed glioma (oligodendroglioma, anaplastic oligodendroglioma)           | Survey: history of asthma (not clear) | aOR (95% CI): 0.4 (0.2, 0.7) (adjusted for age, group, gender, and site)                                                                                                                                                   | History of asthma was associated with a decreased risk of glioma                          |
| 2. Wiemels et al, USA, 2002(2)                                                         | Population-based case-control study                            | -Cases: 405 (cancer registry)<br>-Controls: 402 (random digit dialing methods)<br>-Adults only                                                                                                                                                    | Glioma confirmed by the Northern California Cancer Center's rapid case ascertainment system | Survey: history of wheezing           | aOR (95% CI): 0.57 (0.38-0.86) (adjusted for age, gender, and ethnicity)                                                                                                                                                   | Cases were less likely than controls to report wheezing (history of asthma not available) |
| 3. Safaeian et al, USA, 2013(3)                                                        | Case-control study                                             | -Cases: 851 with European ancestry (two case-controls studies and three prospective cohort studies)<br>-Controls: 3,977 (same hospitals, driver identification records, or Health Care Financing Administration Medicare Records)<br>-Adults only | Histologically confirmed glioma                                                             | Survey: history of asthma             | aOR (95%CI): 0.58 (0.42-0.81) (adjusted for age, gender, and study)                                                                                                                                                        | Reporting asthma was associated with reduced risks of glioma.                             |
| 4. Wigertz et al, 5 countries (Denmark, Norway, Finland, Sweden, and England), 2007(4) | Population-based case-control study (part of INTERPHONE study) | -Case: 1,527 (treating clinics)<br>-Control: 3,309 (population registers)<br>-Adults only                                                                                                                                                         | Glioma confirmed by cancer registries                                                       | Survey: history of asthma             | 1. aOR (95%CI): 0.65 (0.51-0.82) overall<br>2. aOR (95%CI): 0.68 (0.51-0.91) for current asthma<br>3. aOR (95%CI): 0.53 (0.34-0.80) for past asthma (adjusted for age, sex, education, country, and region within country) | There were reduced risks for glioma related to both current and past asthma.              |
| 5. Schoemaker et al, UK, 2006(5)                                                       | Population-based case-control study                            | -Cases: 965 (hospitals or cancer registry)<br>-Controls: 1,716 (general practitioner patient lists)<br>-Adults only                                                                                                                               | Glioma by ICD codes                                                                         | Survey: history of asthma             | aOR (95%CI): 0.71 (0.54-0.92) (adjusted for age, sex, category, region, Survey year, and Townsend deprivation category)                                                                                                    | Risk of glioma was reduced in subjects reporting a history of asthma.                     |

|                                                                                        |                                                                 |                                                                                                                                                             |                                                                           |                           |                                                                                                                                                                                                                                                                                 |                                                                                                                                                                                            |
|----------------------------------------------------------------------------------------|-----------------------------------------------------------------|-------------------------------------------------------------------------------------------------------------------------------------------------------------|---------------------------------------------------------------------------|---------------------------|---------------------------------------------------------------------------------------------------------------------------------------------------------------------------------------------------------------------------------------------------------------------------------|--------------------------------------------------------------------------------------------------------------------------------------------------------------------------------------------|
| 6. Turner et al, 5 countries (Australia, Canada, France, Israel, New Zealand), 2013(6) | International population-based case-control study (INTERPHONE)  | -Cases: 793 (hospitals or nationwide (Israel))<br>-Controls: 2,374 (electoral lists, health/population registries, or random digit dialing)<br>-Adults only | Histologically confirmed glioma or through unequivocal diagnostic imaging | Survey: history of asthma | aOR (95%CI): 0.72 (0.54-0.96)<br>-By age of asthma onset<br>a. <10yrs: 0.85 (0.55-1.33)<br>b. 10-19yrs: 0.86 (0.45-1.64)<br>c. 20+yrs: 0.58 (0.38-0.89)<br>-By grade of glioma<br>a. High grade: 0.62 (0.43-0.88)<br>b. Low grade: 0.89 (0.58-1.37)<br>(adjusted for education) | There was some evidence that the inverse associations with asthma strengthened with increasing age of asthma onset or grade of glioma and weakened with longer time since onset of asthma. |
| 7. Brenner et al, USA, 2002(7)                                                         | Hospital-based case-control study                               | -Cases: 489 (3 hospitals)<br>-Controls (hospitalized for a non-malignant conditions)<br>-Adults only                                                        | Histologically confirmed glioma                                           | Survey: history of asthma | aOR (95%CI): 0.63 (0.43-0.92)<br>(adjusted for age, sex, and postal code)                                                                                                                                                                                                       | There was a significant inverse association between glioma and history of asthma.                                                                                                          |
| <b>B. Statistically non-significant inverse or positive association</b>                |                                                                 |                                                                                                                                                             |                                                                           |                           |                                                                                                                                                                                                                                                                                 |                                                                                                                                                                                            |
| <b>B.1. Adults</b>                                                                     |                                                                 |                                                                                                                                                             |                                                                           |                           |                                                                                                                                                                                                                                                                                 |                                                                                                                                                                                            |
| 8. Ryan et al, Australia, 1992(8)                                                      | Population-based case-control study                             | -Cases: 110 (cancer registry)<br>-Controls: 417 (electoral roll)<br>-Adults only                                                                            | Histologically confirmed glioma                                           | Survey: history of asthma | aRR (95% CI): 0.40 (0.1-1.1)<br>(adjusted for age and sex)                                                                                                                                                                                                                      | A history of atopy or allergic phenomena may be associated with a decreased risk of glioma.                                                                                                |
| 9. Schwartzbaum et al, Sweden, 2005(9)                                                 | Population-based case-control study                             | -Cases: 111 (brain tumor treatment center and regional cancer registries)<br>-Controls: 422 (population registry)<br>-Adults only                           | Glioblastoma multiforme                                                   | Survey: history of asthma | OR (95%CI): 0.64 (0.33-1.25)                                                                                                                                                                                                                                                    | Self-report asthma was inversely related to glioma. Three out of four SNPs previously associated with asthma supported inverse association between asthma and glioma                       |
| 10. Berg-Beckhoff et al, German, 2009(10)                                              | Population-based case-control study (part of INTERPHONE study)  | -Cases: 365 (neurosurgical clinics)<br>-Controls: 732 (population registries)<br>-Adults only                                                               | Histologically confirmed glioma                                           | Survey: history of asthma | aOR (95%CI): 0.65 (0.36-1.19)<br>(adjusted for socioeconomic status, urban vs. rural, smoking history, and age at diagnosis)                                                                                                                                                    | The adjusted odds ratios did not reveal any statistical significant associations between asthma and the occurrence of glioma with yet pointing towards an inverse association.             |
| 11. Pouchieu et al, France, 2018(11)                                                   | Multicenter population-based case-control study (CERENAT study) | -Cases: 273 (cancer registry)<br>-Controls: 546 (local electoral rolls)<br>-Adults only                                                                     | Histopathological diagnosis OR imaging and clinical diagnosis             | Survey: history of asthma | aOR (95% CI): 0.70 (0.37-1.32)<br>(adjusted for educational level and mobile phone use)                                                                                                                                                                                         | History of asthma had an inverse association with glioma, but this association was not statistically significant.                                                                          |
| 12. Schlehofer                                                                         | International                                                   | -Cases: 1,178 (hospitals or                                                                                                                                 | Histologically                                                            | Survey: history of        | RR (95%CI): 0.75 (0.55-                                                                                                                                                                                                                                                         | There was a statistically                                                                                                                                                                  |

|                                                                                      |                                                             |                                                                                                                                                                                                                 |                                                         |                                                                                                       |                                                                                                                                     |                                                                                                                                                                                                                                      |
|--------------------------------------------------------------------------------------|-------------------------------------------------------------|-----------------------------------------------------------------------------------------------------------------------------------------------------------------------------------------------------------------|---------------------------------------------------------|-------------------------------------------------------------------------------------------------------|-------------------------------------------------------------------------------------------------------------------------------------|--------------------------------------------------------------------------------------------------------------------------------------------------------------------------------------------------------------------------------------|
| r et al, 6 countries (Australia, Canada, France, Germany, Sweden, and USA), 1999(12) | population-based case-control study                         | cancer registries)<br>-Controls: 1,987 (population-based controls using different methods depending on each center)<br>-Adults only                                                                             | confirmed glioma                                        | asthma                                                                                                | 1.03)                                                                                                                               | significant inverse association between glioma and asthma.                                                                                                                                                                           |
| 13. Cahoon et al, USA, 2014(13)                                                      | Retrospective cohort study                                  | -4.5 million of male veterans of the USA<br>-4,383 incident, primary brain cancer cases (95% glioma) developed<br>-Adults only (18-100 years)                                                                   | ICD codes                                               | Discharge diagnosis code of asthma ( $\geq 2$ years between diagnosis of asthma and end of follow-up) | RR (95%CI): 0.8 (0.6-1.07)                                                                                                          | This study lends some support to an inverse association between asthma of long duration and risk of brain cancer (not exclusively glioma)                                                                                            |
| 14. Cicuttini et al, Australia, 1997 (14)                                            | Population-based case-control study                         | -Cases: 416 (cancer registry)<br>-Controls: 422 (electoral roll)<br>-Adults only                                                                                                                                | Histologically confirmed glioma                         | Survey: history of asthma                                                                             | aOR (95%CI): 0.8 (0.5-1.2) (adjusted for age and sex)                                                                               | There was no significant association between asthma and the risk of developing glioma.                                                                                                                                               |
| 15. Il'yasova, USA, 2009(15)                                                         | Clinic-based case-control study with three sets of controls | Cases: 388 (two hospitals)<br>Controls: 80 siblings and 191 friends recommended by patient, and 177 clinic-based controls (actively from orthopedic clinics and using flyers placed in clinics)<br>-Adults only | ICD codes                                               | Web-based or telephone survey: history of asthma                                                      | OR (95%CI)<br>-Clinic-based controls: 1.90 (0.89-4.07)<br>-Sibling controls: 0.43 (0.19-1.00)<br>-Friend controls: 0.84 (0.47-1.50) | Asthma showed an inverse association only in the comparison with sibling controls, but not with clinic-based or friend controls. Clinic based controls generally better approximate the prevalence data for population-based groups. |
| 16. Dobbins et al, UK and US, 2011(16)                                               | Multicenter case-control series                             | -Cases: 1,878 (UK GWA study through INTERPHONE study and one US cancer center)<br>-Controls: 3670 (UK Birth Cohort and US CGEMS study)                                                                          | Histologically confirmed or based on diagnostic imaging | SNPs known to be related to asthma (rs7216389, rs1588265, rs1420101)                                  | OR (95%CI) trend for rs7216389 (ORMDL3 at 17q21): 1.10 (1.01-1.19)                                                                  | The observation provides evidence of a positive association between asthma and glioma                                                                                                                                                |
| <b>B.2. Children</b>                                                                 |                                                             |                                                                                                                                                                                                                 |                                                         |                                                                                                       |                                                                                                                                     |                                                                                                                                                                                                                                      |
| 17. Harding et al, UK, 2008(17)                                                      | Population-based case-control study                         | -Cases: 326 (UK Childhood Cancer Study)<br>-Controls: 6,292 (health authorities or health boards)<br>-Children only                                                                                             | ICD-O codes for glioma                                  | Survey: mother's report for child's history of asthma                                                 | aOR (95%CI): 0.90 (0.66-1.23) (adjusted for Townsend deprivation category)                                                          | Asthma by parental report was not associated with glioma.                                                                                                                                                                            |
| 18. Shu et al,                                                                       | Population-                                                 | -Cases: 352 (cancer                                                                                                                                                                                             | Histologically                                          | Survey: parent's                                                                                      | aOR (95%CI)                                                                                                                         | There was no association                                                                                                                                                                                                             |

|                                                    |                                                    |                                                                         |                                                                                                                                            |                                      |                                                                                                                                                              |                                    |
|----------------------------------------------------|----------------------------------------------------|-------------------------------------------------------------------------|--------------------------------------------------------------------------------------------------------------------------------------------|--------------------------------------|--------------------------------------------------------------------------------------------------------------------------------------------------------------|------------------------------------|
| Denmark, Norway, Sweden, and Switzerland, 2014(18) | based case control study (CEFALO)                  | registries)<br>-Controls: 646 (population registries)<br>-Children only | confirmed glioma or through unequivocal diagnostic imaging                                                                                 | report for child's history of asthma | -Overall: 0.99 (0.54-1.82)<br>-Current: 0.97 (0.42-2.25)<br>-Past: 0.80 (0.36-2.22)<br>(adjusted for living on a farm before age 6 and socioeconomic status) | between asthma and risk of glioma. |
| <b>C. Systematic review and meta-analysis</b>      |                                                    |                                                                         |                                                                                                                                            |                                      |                                                                                                                                                              |                                    |
| <b>Author</b>                                      | <b>Study design</b>                                | <b>Study subjects</b>                                                   | <b>Conclusion</b>                                                                                                                          |                                      |                                                                                                                                                              |                                    |
| 19.Zhang et al, 2017(19)                           | Meta-analysis of 9 case control and cohort studies | Cases: 8,435<br>Controls: 118,719                                       | The pooled result indicated that asthma would reduce the risk of glioma by 33% (OR = 0.67, 95% CI = 0.59-0.75, <i>P</i> < 0.001)           |                                      |                                                                                                                                                              |                                    |
| 20.Chen et al, 2010(20)                            | Meta-analysis of 7 case-control studies            | Cases: 5,317<br>Controls: 9,393                                         | The pooled OR for glioma and asthma was 0.70 (95% CI: 0.62-0.79, <i>P</i> <0.001)                                                          |                                      |                                                                                                                                                              |                                    |
| 21.Linos et al, 2007(21)                           | Meta-analysis of 5 case-control studies            | Cases: 3,450<br>participants : 53,223                                   | Pooled RR for glioma among those reporting a history of asthma compared with no such history was 0.68 (95% CI = 0.58-0.80, <i>P</i> <.001) |                                      |                                                                                                                                                              |                                    |

**eTable 2. Indications for testing MRI among MRI negative controls (n=135)**

| <b>Pain (headache)</b> | <b>Stroke (ischemia)</b> | <b>Cranial nerve, vision/ hearing issue</b> | <b>Dementia (memory), psychiatric</b> | <b>Dizziness, syncope</b> | <b>Spell, seizure</b> | <b>Others*</b> | <b>Research</b> |
|------------------------|--------------------------|---------------------------------------------|---------------------------------------|---------------------------|-----------------------|----------------|-----------------|
| 31<br>(23%)            | 23<br>(17%)              | 22<br>(16.5%)                               | 13<br>(9.5%)                          | 13<br>(9.5%)              | 13<br>(9.5%)          | 10<br>(7.5%)   | 10<br>(7.5%)    |

\* Others include developmental concern pituitary concern, and deep brain stimulation.

**eFigure1. Number of Cases and Controls after applying the exclusion criteria**

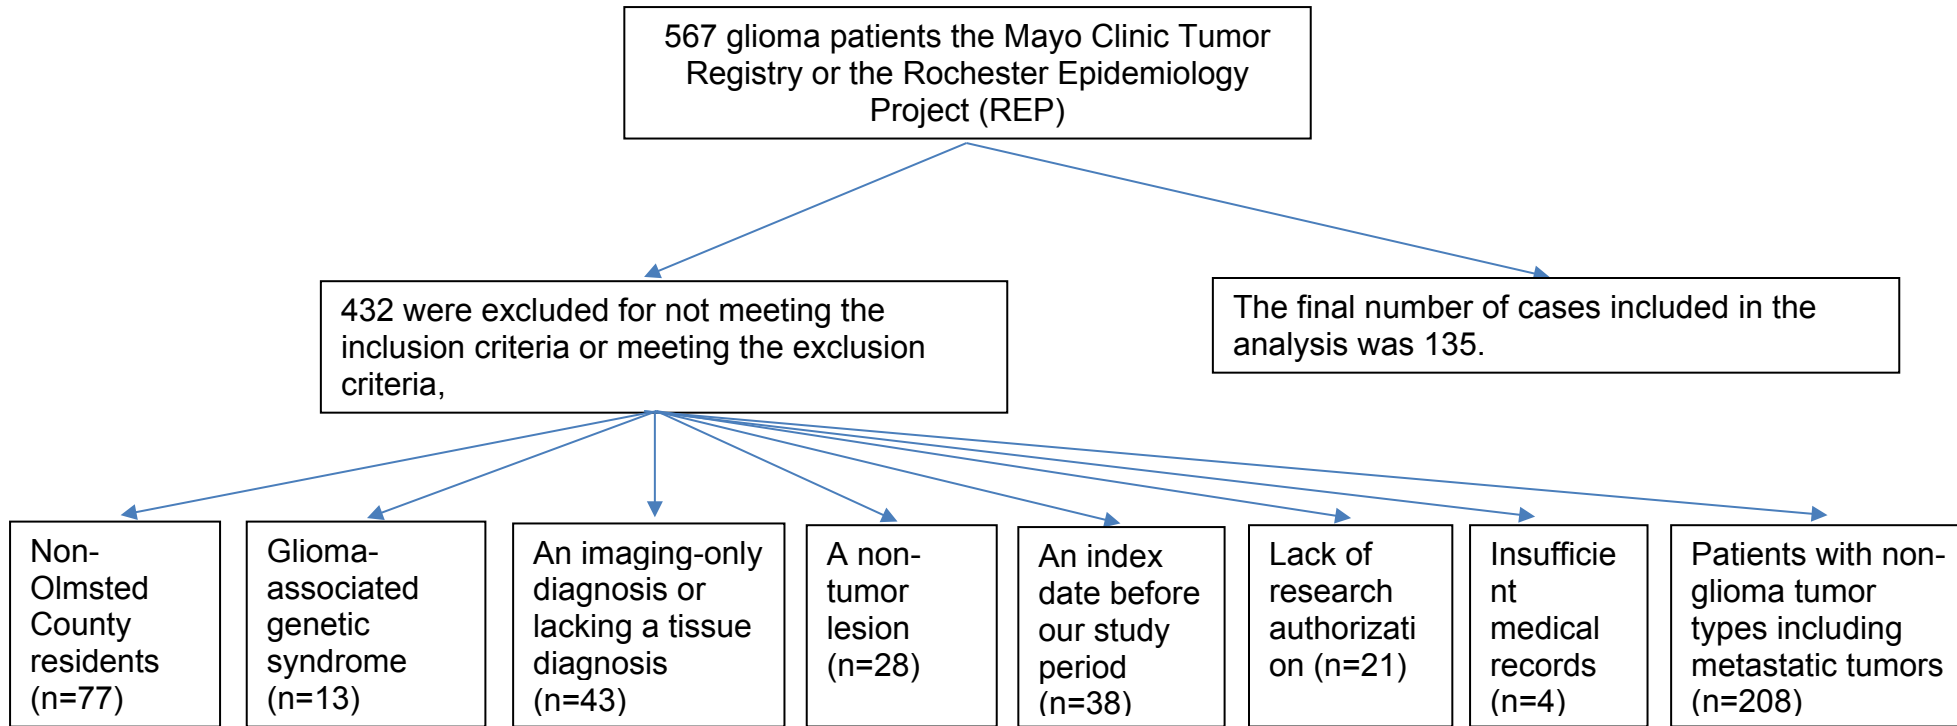

## References:

1. McCarthy BJ, Rankin KM, Aldape K, Bondy ML, Brannstrom T, Broholm H, et al. Risk factors for oligodendroglial tumors: a pooled international study. *Neuro Oncol.* 2011;13(2):242-50.28. Brenner AV, Linet MS, Fine HA, Shapiro WR, Selker RG, Black PM, et al. History of allergies and autoimmune diseases and risk of brain tumors in adults. *Int J Cancer.* 2002;99(2):252-9.
2. Wiemels JL, Wiencke JK, Sison JD, Miike R, McMillan A, Wrensch M. History of allergies among adults with glioma and controls. *Int J Cancer.* 2002;98(4):609-15.
3. Safaeian M, Rajaraman P, Hartge P, Yeager M, Linet M, Butler MA, et al. Joint effects between five identified risk variants, allergy, and autoimmune conditions on glioma risk. *Cancer Cause Control.* 2013;24(10):1885-91.
4. Wigertz A, Lonn S, Schwartzbaum J, Hall P, Auvinen A, Christensen HC, et al. Allergic conditions and brain tumor risk. *American journal of epidemiology.* 2007;166(8):941-50.
5. Schoemaker MJ, Swerdlow AJ, Hepworth SJ, McKinney PA, van Tongeren M, Muir KR. History of allergies and risk of glioma in adults. *Int J Cancer.* 2006;119(9):2165-72.
6. Turner MC, Krewski D, Armstrong BK, Chetrit A, Giles GG, Hours M, et al. Allergy and brain tumors in the INTERPHONE study: pooled results from Australia, Canada, France, Israel, and New Zealand. *Cancer Causes Control.* 2013;24(5):949-60.
7. Brenner AV, Linet MS, Fine HA, Shapiro WR, Selker RG, Black PM, et al. History of allergies and autoimmune diseases and risk of brain tumors in adults. *Int J Cancer.* 2002;99(2):252-9.
8. Ryan P, Lee MW, North B, McMichael AJ. Risk factors for tumors of the brain and meninges: results from the Adelaide Adult Brain Tumor Study. *Int J Cancer.* 1992;51(1):20-7.
9. Schwartzbaum J, Ahlbom A, Malmer B, Lonn S, Brookes AJ, Doss H, et al. Polymorphisms associated with asthma are inversely related to glioblastoma multiforme. *Cancer Res.* 2005;65(14):6459-65.
10. Berg-Beckhoff G, Schuz J, Blettner M, Munster E, Schlaefer K, Wahrendorf J, et al. History of allergic disease and epilepsy and risk of glioma and meningioma (INTERPHONE study group, Germany). *Eur J Epidemiol.* 2009;24(8):433-40.
11. Pouchieu C, Raheison C, Piel C, Migault L, Carles C, Fabbro-Perray P, et al. Allergic conditions and risk of glioma and meningioma in the CERENAT case-control study. *J Neurooncol.* 2018;138(2):271-81.
12. Schlehofer B, Blettner M, Preston-Martin S, Niehoff D, Wahrendorf J, Arslan A, et al. Role of medical history in brain tumour development. Results from the international adult brain tumour study. *Int J Cancer.* 1999;82(2):155-60.
13. Cahoon EK, Inskip PD, Gridley G, Brenner AV. Immune-related conditions and subsequent risk of brain cancer in a cohort of 4.5 million male US veterans. *Br J Cancer.* 2014;110(7):1825-33.
14. Cicuttini FM, Hurley SF, Forbes A, Donnan GA, Salzberg M, Giles GG, et al. Association of adult glioma with medical conditions, family and reproductive history. *Int J Cancer.* 1997;71(2):203-7.
15. Il'yasova D, McCarthy B, Marcello J, Schildkraut JM, Moorman PG, Krishnamachari B, et al. Association between glioma and history of allergies, asthma, and eczema: a case-control study with three groups of controls. *Cancer Epidemiol Biomarkers Prev.* 2009;18(4):1232-8.

16. Dobbins SE, Hosking FJ, Shete S, Armstrong G, Swerdlow A, Liu Y, et al. Allergy and glioma risk: test of association by genotype. *Int J Cancer*. 2011;128(7):1736-40.
17. Harding NJ, Birch JM, Hepworth SJ, McKinney PA. Atopic dysfunction and risk of central nervous system tumours in children. *Eur J Cancer*. 2008;44(1):92-9.
18. Shu X, Prochazka M, Lannering B, Schuz J, Roosli M, Tynes T, et al. Atopic conditions and brain tumor risk in children and adolescents--an international case-control study (CEFALO). *Ann Oncol*. 2014;25(4):902-8.
19. Zhang C, Zhu QX. Allergy is associated with reduced risk of glioma: A meta-analysis. *Allergol Immunopathol (Madr)*. 2017;45(6):553-9.
20. Chen C, Xu T, Chen J, Zhou J, Yan Y, Lu Y, et al. Allergy and risk of glioma: a meta-analysis. *Eur J Neurol*. 2011;18(3):387-95.
21. Linos E, Raine T, Alonso A, Michaud D. Atopy and risk of brain tumors: a meta-analysis. *Journal of the National Cancer Institute*. 2007;99(20):1544-50.
